# Supplementary material for: The New Klebsiella pneumoniae ST152 Variants with Hypermucoviscous Phenotype Isolated from Renal Transplant Recipients with Asymptomatic Bacteriuria—Genetic Characteristics by WGS
Source: PubMed Central journal article supplement (PMC7601988; doi:10.3390/genes11101189), 2020-10-13
Supplement: genes-11-01189-s001.pdf [file genes-11-01189-s001.pdf]

Article

# The new *Klebsiella pneumoniae* ST152 variants with hypermucoviscous phenotype isolated from renal transplant recipients with asymptomatic bacteriuria – genetic characteristics by WGS

Magdalena Wysocka <sup>1</sup>, Roxana Zamudio <sup>2</sup>, Marco R Oggioni <sup>2</sup>, Justyna Gołębiewska <sup>3</sup>, Aleksandra Dudziak <sup>4</sup> and Beata Krawczyk <sup>1,\*</sup>

<sup>1</sup> Department of Molecular Biotechnology and Microbiology, Faculty of Chemistry, Gdańsk University of Technology, ul. Narutowicza 11/12, 80-233 Gdańsk, Poland.

<sup>2</sup> Department of Genetics and Genome Biology, University of Leicester, University Road, Leicester LE1 7RH, United Kingdom.

<sup>3</sup> Department of Nephrology, Transplantology and Internal Medicine, Medical University of Gdańsk, ul. Dębinki 7, 80-952 Gdańsk, Poland.

<sup>4</sup> Laboratory of Clinical Microbiology, University Centre for Laboratory Diagnostics, Medical University of Gdańsk Clinical Centre, ul. Dębinki 7, 80-952 Gdańsk, Poland.

\* Correspondence: beata.krawczyk@pg.edu.pl; Tel.: +48-58-347-23-83

Received: date; Accepted: date; Published: date

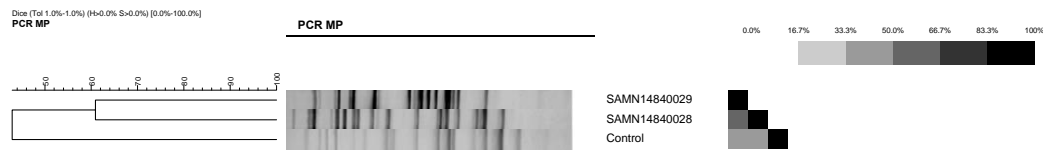

**Figure S1:** The distance tree of HM Kp isolates using clustering with the unweighted pair group method with arithmetic mean (UPGMA). SAMN14840028 – the isolate from case 1 (KP28872); SAMN14840029 – the isolate from case 2 (KP28873); Control – ATCC 700603 *K. pneumoniae* reference strain.

Supplementary Materials

Table S1: Genome metadata of *Klebsiella pneumoniae* isolates from this study.

| Genome name | BioSample    | BioProject  | Genome accession | Country | Hospital   | Year | Source | ST  | Ktype | contigs | Largest contig | Total length | GC (%) | N50    | N75   | L50 | L75 | # N's per 100 kbp | num_seqs | Length | Depth | sum_len   | min_len | avg_len | max_len | gap_P   | inf_B   | md_h   | pg_i   | pho_E   | rpo_B   | ton_B    |
|-------------|--------------|-------------|------------------|---------|------------|------|--------|-----|-------|---------|----------------|--------------|--------|--------|-------|-----|-----|-------------------|----------|--------|-------|-----------|---------|---------|---------|---------|---------|--------|--------|---------|---------|----------|
| KP28872     | SAMN14840028 | PRJNA630564 | JABFQQ000000000  | Poland  | UCK Gdansk | 2018 | urine  | 152 | KL149 | 365     | 389262         | 5928480      | 56.85  | 126807 | 71673 | 15  | 30  | 0.05              | 1047139  | 250    | 49.1  | 197093943 | 36      | 188.2   | 251     | gapA(2) | infB(3) | mdh(2) | pgi(1) | phoE(1) | rpoB(4) | tonB(56) |
| KP28873     | SAMN14840029 | PRJNA630564 | JABFQR000000000  | Poland  | UCK Gdansk | 2018 | urine  | 152 | KL149 | 116     | 355714         | 5377974      | 57.45  | 139101 | 84334 | 14  | 27  | 0.00              | 528831   | 250    | 24.8  | 111070198 | 36      | 210     | 251     | gapA(2) | infB(3) | mdh(2) | pgi(1) | phoE(1) | rpoB(4) | tonB(56) |

## Supplementary Materials

Table S2: Prediction of plasmid and chromosomal contigs from draft assemblies using RFplasmid tool.

| Genome name | Case   | Contigs | Prediction  | Votes chromosomal | Votes plasmid | ContigID                          |
|-------------|--------|---------|-------------|-------------------|---------------|-----------------------------------|
| KP28872     | case_1 | 1       | chromosomal | 0.995             | 0.005         | NODE_1_length_389262_cov_34.9217  |
| KP28872     | case_1 | 10      | chromosomal | 0.999             | 0.001         | NODE_10_length_174404_cov_36.9282 |
| KP28872     | case_1 | 100     | chromosomal | 0.716             | 0.284         | NODE_100_length_4052_cov_5.69484  |
| KP28872     | case_1 | 101     | chromosomal | 0.639             | 0.361         | NODE_101_length_3975_cov_4.62083  |
| KP28872     | case_1 | 102     | chromosomal | 0.746             | 0.254         | NODE_102_length_3897_cov_4.10759  |
| KP28872     | case_1 | 103     | chromosomal | 0.794             | 0.206         | NODE_103_length_3894_cov_3.53707  |
| KP28872     | case_1 | 104     | chromosomal | 0.777             | 0.223         | NODE_104_length_3892_cov_4.82752  |
| KP28872     | case_1 | 105     | plasmid     | 0.122             | 0.878         | NODE_105_length_3827_cov_23.512   |
| KP28872     | case_1 | 106     | chromosomal | 0.726             | 0.274         | NODE_106_length_3826_cov_4.44732  |
| KP28872     | case_1 | 107     | chromosomal | 0.758             | 0.242         | NODE_107_length_3823_cov_4.34357  |
| KP28872     | case_1 | 108     | chromosomal | 0.855             | 0.145         | NODE_108_length_3823_cov_32.9909  |
| KP28872     | case_1 | 109     | chromosomal | 0.518             | 0.482         | NODE_109_length_3816_cov_3.89917  |
| KP28872     | case_1 | 11      | chromosomal | 0.999             | 0.001         | NODE_11_length_148322_cov_40.0058 |
| KP28872     | case_1 | 110     | chromosomal | 0.77              | 0.23          | NODE_110_length_3772_cov_4.08444  |
| KP28872     | case_1 | 111     | chromosomal | 0.788             | 0.212         | NODE_111_length_3762_cov_3.86893  |
| KP28872     | case_1 | 112     | chromosomal | 0.908             | 0.092         | NODE_112_length_3761_cov_3.86781  |
| KP28872     | case_1 | 113     | chromosomal | 0.873             | 0.127         | NODE_113_length_3694_cov_3.98341  |
| KP28872     | case_1 | 114     | chromosomal | 0.821             | 0.179         | NODE_114_length_3667_cov_3.87103  |
| KP28872     | case_1 | 115     | chromosomal | 0.652             | 0.348         | NODE_115_length_3648_cov_3.23775  |
| KP28872     | case_1 | 116     | plasmid     | 0.229             | 0.771         | NODE_116_length_3602_cov_15.9452  |
| KP28872     | case_1 | 117     | chromosomal | 0.661             | 0.339         | NODE_117_length_3443_cov_4.41949  |
| KP28872     | case_1 | 118     | chromosomal | 0.845             | 0.155         | NODE_118_length_3429_cov_3.51193  |
| KP28872     | case_1 | 119     | chromosomal | 0.861             | 0.139         | NODE_119_length_3407_cov_5.23363  |
| KP28872     | case_1 | 12      | chromosomal | 0.996             | 0.004         | NODE_12_length_144887_cov_40.7587 |
| KP28872     | case_1 | 120     | chromosomal | 0.879             | 0.121         | NODE_120_length_3354_cov_3.80867  |
| KP28872     | case_1 | 121     | chromosomal | 0.781             | 0.219         | NODE_121_length_3301_cov_29.5639  |
| KP28872     | case_1 | 122     | chromosomal | 0.879             | 0.121         | NODE_122_length_3202_cov_3.75136  |
| KP28872     | case_1 | 123     | chromosomal | 0.788             | 0.212         | NODE_123_length_3187_cov_3.33987  |
| KP28872     | case_1 | 124     | chromosomal | 0.801             | 0.199         | NODE_124_length_3183_cov_4.47778  |
| KP28872     | case_1 | 125     | chromosomal | 0.682             | 0.318         | NODE_125_length_3140_cov_31.1877  |
| KP28872     | case_1 | 126     | chromosomal | 0.823             | 0.177         | NODE_126_length_3118_cov_4.14765  |
| KP28872     | case_1 | 127     | chromosomal | 0.84              | 0.16          | NODE_127_length_3086_cov_5.01263  |
| KP28872     | case_1 | 128     | chromosomal | 0.753             | 0.247         | NODE_128_length_3080_cov_3.30037  |
| KP28872     | case_1 | 129     | chromosomal | 0.798             | 0.202         | NODE_129_length_3047_cov_8.93199  |
| KP28872     | case_1 | 13      | chromosomal | 0.991             | 0.009         | NODE_13_length_143779_cov_35.9103 |
| KP28872     | case_1 | 130     | chromosomal | 0.613             | 0.387         | NODE_130_length_3021_cov_4.33356  |
| KP28872     | case_1 | 131     | chromosomal | 0.762             | 0.238         | NODE_131_length_2996_cov_4.62727  |
| KP28872     | case_1 | 132     | chromosomal | 0.81              | 0.19          | NODE_132_length_2995_cov_4.00754  |
| KP28872     | case_1 | 133     | plasmid     | 0.282             | 0.718         | NODE_133_length_2976_cov_15.4984  |
| KP28872     | case_1 | 134     | chromosomal | 0.981             | 0.019         | NODE_134_length_2976_cov_371.22   |
| KP28872     | case_1 | 135     | chromosomal | 0.543             | 0.457         | NODE_135_length_2938_cov_2.94932  |
| KP28872     | case_1 | 136     | chromosomal | 0.847             | 0.153         | NODE_136_length_2886_cov_4.50338  |
| KP28872     | case_1 | 137     | chromosomal | 0.788             | 0.212         | NODE_137_length_2875_cov_4.63331  |
| KP28872     | case_1 | 138     | chromosomal | 0.755             | 0.245         | NODE_138_length_2786_cov_4.811    |
| KP28872     | case_1 | 139     | plasmid     | 0.392             | 0.608         | NODE_139_length_2762_cov_11.4629  |
| KP28872     | case_1 | 14      | chromosomal | 0.881             | 0.119         | NODE_14_length_131869_cov_35.6086 |
| KP28872     | case_1 | 140     | chromosomal | 0.64              | 0.36          | NODE_140_length_2760_cov_3.99627  |
| KP28872     | case_1 | 141     | chromosomal | 0.671             | 0.329         | NODE_141_length_2757_cov_4.50075  |
| KP28872     | case_1 | 142     | chromosomal | 0.729             | 0.271         | NODE_142_length_2738_cov_3.75272  |
| KP28872     | case_1 | 143     | chromosomal | 0.736             | 0.264         | NODE_143_length_2713_cov_5.15175  |
| KP28872     | case_1 | 144     | chromosomal | 0.874             | 0.126         | NODE_144_length_2653_cov_5.18944  |
| KP28872     | case_1 | 145     | chromosomal | 0.778             | 0.222         | NODE_145_length_2600_cov_5.03409  |
| KP28872     | case_1 | 146     | chromosomal | 0.645             | 0.355         | NODE_146_length_2565_cov_9.01768  |

## Supplementary Materials

|         |        |     |             |       |       |                                   |
|---------|--------|-----|-------------|-------|-------|-----------------------------------|
| KP28872 | case_1 | 147 | chromosomal | 0.648 | 0.352 | NODE_147_length_2558_cov_4.57678  |
| KP28872 | case_1 | 148 | plasmid     | 0.476 | 0.524 | NODE_148_length_2511_cov_4.68817  |
| KP28872 | case_1 | 149 | chromosomal | 0.763 | 0.237 | NODE_149_length_2500_cov_3.35988  |
| KP28872 | case_1 | 15  | chromosomal | 0.982 | 0.018 | NODE_15_length_126807_cov_40.3171 |
| KP28872 | case_1 | 150 | chromosomal | 0.795 | 0.205 | NODE_150_length_2491_cov_41.534   |
| KP28872 | case_1 | 151 | chromosomal | 0.681 | 0.319 | NODE_151_length_2472_cov_3.78455  |
| KP28872 | case_1 | 152 | chromosomal | 0.657 | 0.343 | NODE_152_length_2446_cov_3.46729  |
| KP28872 | case_1 | 153 | chromosomal | 0.64  | 0.36  | NODE_153_length_2440_cov_26.7253  |
| KP28872 | case_1 | 154 | chromosomal | 0.861 | 0.139 | NODE_154_length_2407_cov_5.09056  |
| KP28872 | case_1 | 155 | chromosomal | 0.676 | 0.324 | NODE_155_length_2394_cov_4.42943  |
| KP28872 | case_1 | 156 | chromosomal | 0.756 | 0.244 | NODE_156_length_2392_cov_3.29028  |
| KP28872 | case_1 | 157 | chromosomal | 0.803 | 0.197 | NODE_157_length_2370_cov_2.93371  |
| KP28872 | case_1 | 158 | chromosomal | 0.6   | 0.4   | NODE_158_length_2365_cov_2.15472  |
| KP28872 | case_1 | 159 | chromosomal | 0.685 | 0.315 | NODE_159_length_2358_cov_3.56291  |
| KP28872 | case_1 | 16  | chromosomal | 0.993 | 0.007 | NODE_16_length_119949_cov_35.035  |
| KP28872 | case_1 | 160 | chromosomal | 0.512 | 0.488 | NODE_160_length_2349_cov_3.65097  |
| KP28872 | case_1 | 161 | chromosomal | 0.813 | 0.187 | NODE_161_length_2337_cov_3.27168  |
| KP28872 | case_1 | 162 | chromosomal | 0.83  | 0.17  | NODE_162_length_2316_cov_3.28495  |
| KP28872 | case_1 | 163 | chromosomal | 0.778 | 0.222 | NODE_163_length_2283_cov_4.06754  |
| KP28872 | case_1 | 164 | chromosomal | 0.652 | 0.348 | NODE_164_length_2281_cov_2.73775  |
| KP28872 | case_1 | 165 | chromosomal | 0.823 | 0.177 | NODE_165_length_2277_cov_3.22182  |
| KP28872 | case_1 | 166 | chromosomal | 0.852 | 0.148 | NODE_166_length_2265_cov_3.73537  |
| KP28872 | case_1 | 167 | plasmid     | 0.491 | 0.509 | NODE_167_length_2263_cov_26.2928  |
| KP28872 | case_1 | 168 | chromosomal | 0.844 | 0.156 | NODE_168_length_2241_cov_2.79529  |
| KP28872 | case_1 | 169 | chromosomal | 0.846 | 0.154 | NODE_169_length_2191_cov_4.85525  |
| KP28872 | case_1 | 17  | chromosomal | 0.969 | 0.031 | NODE_17_length_119920_cov_34.307  |
| KP28872 | case_1 | 170 | plasmid     | 0.466 | 0.534 | NODE_170_length_2180_cov_17.4926  |
| KP28872 | case_1 | 171 | plasmid     | 0.37  | 0.63  | NODE_171_length_2179_cov_3.29876  |
| KP28872 | case_1 | 172 | chromosomal | 0.565 | 0.435 | NODE_172_length_2177_cov_3.57143  |
| KP28872 | case_1 | 173 | chromosomal | 0.832 | 0.168 | NODE_173_length_2158_cov_5.97501  |
| KP28872 | case_1 | 174 | chromosomal | 0.662 | 0.338 | NODE_174_length_2032_cov_3.43478  |
| KP28872 | case_1 | 175 | chromosomal | 0.712 | 0.288 | NODE_175_length_2023_cov_3.20195  |
| KP28872 | case_1 | 176 | chromosomal | 0.761 | 0.239 | NODE_176_length_2015_cov_4.20691  |
| KP28872 | case_1 | 177 | chromosomal | 0.841 | 0.159 | NODE_177_length_1974_cov_4.07696  |
| KP28872 | case_1 | 178 | chromosomal | 0.733 | 0.267 | NODE_178_length_1946_cov_3.71803  |
| KP28872 | case_1 | 179 | chromosomal | 0.729 | 0.271 | NODE_179_length_1928_cov_5.37709  |
| KP28872 | case_1 | 18  | chromosomal | 0.996 | 0.004 | NODE_18_length_105981_cov_40.6289 |
| KP28872 | case_1 | 180 | chromosomal | 0.79  | 0.21  | NODE_180_length_1924_cov_3.79101  |
| KP28872 | case_1 | 181 | chromosomal | 0.731 | 0.269 | NODE_181_length_1922_cov_2.92195  |
| KP28872 | case_1 | 182 | chromosomal | 0.663 | 0.337 | NODE_182_length_1913_cov_261.973  |
| KP28872 | case_1 | 183 | chromosomal | 0.981 | 0.019 | NODE_183_length_1888_cov_67.3407  |
| KP28872 | case_1 | 184 | chromosomal | 0.753 | 0.247 | NODE_184_length_1881_cov_4.66463  |
| KP28872 | case_1 | 185 | chromosomal | 0.799 | 0.201 | NODE_185_length_1874_cov_4.55259  |
| KP28872 | case_1 | 186 | chromosomal | 0.806 | 0.194 | NODE_186_length_1868_cov_4.31156  |
| KP28872 | case_1 | 187 | chromosomal | 0.578 | 0.422 | NODE_187_length_1859_cov_2.77385  |
| KP28872 | case_1 | 188 | chromosomal | 0.675 | 0.325 | NODE_188_length_1805_cov_3.48611  |
| KP28872 | case_1 | 189 | plasmid     | 0.15  | 0.85  | NODE_189_length_1787_cov_15.7918  |
| KP28872 | case_1 | 19  | chromosomal | 0.629 | 0.371 | NODE_19_length_104776_cov_30.0928 |
| KP28872 | case_1 | 190 | chromosomal | 0.82  | 0.18  | NODE_190_length_1780_cov_4.36524  |
| KP28872 | case_1 | 191 | chromosomal | 0.798 | 0.202 | NODE_191_length_1773_cov_8.90212  |
| KP28872 | case_1 | 192 | chromosomal | 0.789 | 0.211 | NODE_192_length_1763_cov_4.26572  |
| KP28872 | case_1 | 193 | chromosomal | 0.823 | 0.177 | NODE_193_length_1737_cov_3.98253  |
| KP28872 | case_1 | 194 | chromosomal | 0.982 | 0.018 | NODE_194_length_1725_cov_369.802  |
| KP28872 | case_1 | 195 | chromosomal | 0.775 | 0.225 | NODE_195_length_1686_cov_3.3729   |
| KP28872 | case_1 | 196 | chromosomal | 0.55  | 0.45  | NODE_196_length_1685_cov_3.58022  |
| KP28872 | case_1 | 197 | chromosomal | 0.787 | 0.213 | NODE_197_length_1652_cov_3.65016  |

## Supplementary Materials

|         |        |     |             |       |       |                                   |
|---------|--------|-----|-------------|-------|-------|-----------------------------------|
| KP28872 | case_1 | 198 | chromosomal | 0.89  | 0.11  | NODE_198_length_1646_cov_2.79732  |
| KP28872 | case_1 | 199 | plasmid     | 0.291 | 0.709 | NODE_199_length_1632_cov_11.409   |
| KP28872 | case_1 | 2   | chromosomal | 0.998 | 0.002 | NODE_2_length_292640_cov_38.7891  |
| KP28872 | case_1 | 20  | chromosomal | 0.996 | 0.004 | NODE_20_length_100509_cov_41.0535 |
| KP28872 | case_1 | 200 | chromosomal | 0.622 | 0.378 | NODE_200_length_1611_cov_4.04563  |
| KP28872 | case_1 | 201 | chromosomal | 0.827 | 0.173 | NODE_201_length_1607_cov_9.9366   |
| KP28872 | case_1 | 202 | chromosomal | 0.837 | 0.163 | NODE_202_length_1590_cov_3.67878  |
| KP28872 | case_1 | 203 | plasmid     | 0.269 | 0.731 | NODE_203_length_1574_cov_29.3273  |
| KP28872 | case_1 | 204 | chromosomal | 0.748 | 0.252 | NODE_204_length_1532_cov_5.47216  |
| KP28872 | case_1 | 205 | chromosomal | 0.816 | 0.184 | NODE_205_length_1511_cov_3.16109  |
| KP28872 | case_1 | 206 | chromosomal | 0.585 | 0.415 | NODE_206_length_1511_cov_14.9331  |
| KP28872 | case_1 | 207 | chromosomal | 0.745 | 0.255 | NODE_207_length_1471_cov_8.04806  |
| KP28872 | case_1 | 208 | chromosomal | 0.999 | 0.001 | NODE_208_length_1445_cov_136.04   |
| KP28872 | case_1 | 209 | chromosomal | 0.515 | 0.485 | NODE_209_length_1436_cov_3.52024  |
| KP28872 | case_1 | 21  | chromosomal | 0.986 | 0.014 | NODE_21_length_99297_cov_39.5594  |
| KP28872 | case_1 | 210 | chromosomal | 0.72  | 0.28  | NODE_210_length_1423_cov_3.57727  |
| KP28872 | case_1 | 211 | chromosomal | 0.569 | 0.431 | NODE_211_length_1412_cov_2.54757  |
| KP28872 | case_1 | 212 | chromosomal | 0.693 | 0.307 | NODE_212_length_1386_cov_4.0466   |
| KP28872 | case_1 | 213 | chromosomal | 0.692 | 0.308 | NODE_213_length_1381_cov_3.67331  |
| KP28872 | case_1 | 214 | chromosomal | 0.769 | 0.231 | NODE_214_length_1367_cov_3.39535  |
| KP28872 | case_1 | 215 | plasmid     | 0.013 | 0.987 | NODE_215_length_1363_cov_29.1042  |
| KP28872 | case_1 | 216 | chromosomal | 0.833 | 0.167 | NODE_216_length_1361_cov_4.12695  |
| KP28872 | case_1 | 217 | chromosomal | 0.754 | 0.246 | NODE_217_length_1342_cov_3.56285  |
| KP28872 | case_1 | 218 | chromosomal | 0.606 | 0.394 | NODE_218_length_1341_cov_2.1606   |
| KP28872 | case_1 | 219 | chromosomal | 0.746 | 0.254 | NODE_219_length_1335_cov_2.39587  |
| KP28872 | case_1 | 22  | chromosomal | 0.998 | 0.002 | NODE_22_length_95737_cov_39.6323  |
| KP28872 | case_1 | 220 | chromosomal | 0.68  | 0.32  | NODE_220_length_1324_cov_2.73857  |
| KP28872 | case_1 | 221 | chromosomal | 0.587 | 0.413 | NODE_221_length_1310_cov_2.41687  |
| KP28872 | case_1 | 222 | chromosomal | 0.613 | 0.387 | NODE_222_length_1305_cov_2.53502  |
| KP28872 | case_1 | 223 | chromosomal | 0.708 | 0.292 | NODE_223_length_1284_cov_3.29577  |
| KP28872 | case_1 | 224 | chromosomal | 0.843 | 0.157 | NODE_224_length_1279_cov_4.26373  |
| KP28872 | case_1 | 225 | chromosomal | 0.685 | 0.315 | NODE_225_length_1270_cov_5.8575   |
| KP28872 | case_1 | 226 | chromosomal | 0.568 | 0.432 | NODE_226_length_1249_cov_3.25597  |
| KP28872 | case_1 | 227 | chromosomal | 0.804 | 0.196 | NODE_227_length_1243_cov_80.3465  |
| KP28872 | case_1 | 228 | chromosomal | 0.769 | 0.231 | NODE_228_length_1241_cov_2.4854   |
| KP28872 | case_1 | 229 | chromosomal | 0.61  | 0.39  | NODE_229_length_1221_cov_5.3243   |
| KP28872 | case_1 | 23  | chromosomal | 0.999 | 0.001 | NODE_23_length_94236_cov_39.0218  |
| KP28872 | case_1 | 230 | plasmid     | 0.088 | 0.912 | NODE_230_length_1221_cov_406.885  |
| KP28872 | case_1 | 231 | chromosomal | 0.628 | 0.372 | NODE_231_length_1200_cov_3.58949  |
| KP28872 | case_1 | 232 | chromosomal | 0.759 | 0.241 | NODE_232_length_1198_cov_2.60125  |
| KP28872 | case_1 | 233 | plasmid     | 0.357 | 0.643 | NODE_233_length_1196_cov_278.592  |
| KP28872 | case_1 | 234 | chromosomal | 0.605 | 0.395 | NODE_234_length_1195_cov_6.4186   |
| KP28872 | case_1 | 235 | chromosomal | 0.738 | 0.262 | NODE_235_length_1189_cov_4.45234  |
| KP28872 | case_1 | 236 | chromosomal | 0.663 | 0.337 | NODE_236_length_1187_cov_4.05135  |
| KP28872 | case_1 | 237 | chromosomal | 0.805 | 0.195 | NODE_237_length_1187_cov_2.82252  |
| KP28872 | case_1 | 238 | chromosomal | 0.506 | 0.494 | NODE_238_length_1169_cov_7.61813  |
| KP28872 | case_1 | 239 | chromosomal | 0.733 | 0.267 | NODE_239_length_1169_cov_4.38004  |
| KP28872 | case_1 | 24  | chromosomal | 0.991 | 0.009 | NODE_24_length_88599_cov_38.1272  |
| KP28872 | case_1 | 240 | chromosomal | 0.819 | 0.181 | NODE_240_length_1158_cov_2.57909  |
| KP28872 | case_1 | 241 | chromosomal | 0.782 | 0.218 | NODE_241_length_1136_cov_3.55902  |
| KP28872 | case_1 | 242 | chromosomal | 0.65  | 0.35  | NODE_242_length_1134_cov_4.17408  |
| KP28872 | case_1 | 243 | chromosomal | 0.592 | 0.408 | NODE_243_length_1132_cov_2.16019  |
| KP28872 | case_1 | 244 | chromosomal | 0.671 | 0.329 | NODE_244_length_1123_cov_3.30688  |
| KP28872 | case_1 | 245 | chromosomal | 0.614 | 0.386 | NODE_245_length_1118_cov_2.95485  |
| KP28872 | case_1 | 246 | chromosomal | 0.848 | 0.152 | NODE_246_length_1096_cov_52.2149  |
| KP28872 | case_1 | 247 | chromosomal | 0.718 | 0.282 | NODE_247_length_1088_cov_3.27102  |

## Supplementary Materials

|         |        |     |             |       |       |                                  |
|---------|--------|-----|-------------|-------|-------|----------------------------------|
| KP28872 | case_1 | 248 | chromosomal | 0.711 | 0.289 | NODE_248_length_1086_cov_4.74133 |
| KP28872 | case_1 | 249 | chromosomal | 0.605 | 0.395 | NODE_249_length_1083_cov_2.47515 |
| KP28872 | case_1 | 25  | chromosomal | 1     | 0     | NODE_25_length_86606_cov_39.0921 |
| KP28872 | case_1 | 250 | chromosomal | 0.713 | 0.287 | NODE_250_length_1047_cov_2.72474 |
| KP28872 | case_1 | 251 | chromosomal | 0.63  | 0.37  | NODE_251_length_1024_cov_4.00211 |
| KP28872 | case_1 | 252 | chromosomal | 0.996 | 0.004 | NODE_252_length_1013_cov_85.2179 |
| KP28872 | case_1 | 253 | chromosomal | 0.746 | 0.254 | NODE_253_length_1002_cov_3.30919 |
| KP28872 | case_1 | 254 | chromosomal | 0.717 | 0.283 | NODE_254_length_1001_cov_2.14394 |
| KP28872 | case_1 | 255 | chromosomal | 0.723 | 0.277 | NODE_255_length_993_cov_5.41157  |
| KP28872 | case_1 | 256 | chromosomal | 0.744 | 0.256 | NODE_256_length_992_cov_1.70383  |
| KP28872 | case_1 | 257 | chromosomal | 0.702 | 0.298 | NODE_257_length_984_cov_3.56009  |
| KP28872 | case_1 | 258 | chromosomal | 0.656 | 0.344 | NODE_258_length_971_cov_2.56376  |
| KP28872 | case_1 | 259 | chromosomal | 0.723 | 0.277 | NODE_259_length_936_cov_2.4156   |
| KP28872 | case_1 | 26  | chromosomal | 0.98  | 0.02  | NODE_26_length_85140_cov_41.6301 |
| KP28872 | case_1 | 260 | chromosomal | 0.664 | 0.336 | NODE_260_length_932_cov_2.53567  |
| KP28872 | case_1 | 261 | chromosomal | 0.792 | 0.208 | NODE_261_length_930_cov_4.11723  |
| KP28872 | case_1 | 262 | chromosomal | 0.76  | 0.24  | NODE_262_length_927_cov_6.07294  |
| KP28872 | case_1 | 263 | chromosomal | 0.62  | 0.38  | NODE_263_length_915_cov_2.45107  |
| KP28872 | case_1 | 264 | chromosomal | 0.6   | 0.4   | NODE_264_length_904_cov_2.3821   |
| KP28872 | case_1 | 265 | chromosomal | 0.626 | 0.374 | NODE_265_length_900_cov_1.78493  |
| KP28872 | case_1 | 266 | chromosomal | 0.701 | 0.299 | NODE_266_length_894_cov_5.80416  |
| KP28872 | case_1 | 267 | chromosomal | 0.777 | 0.223 | NODE_267_length_890_cov_7.55474  |
| KP28872 | case_1 | 268 | chromosomal | 0.745 | 0.255 | NODE_268_length_885_cov_5.6349   |
| KP28872 | case_1 | 269 | chromosomal | 0.594 | 0.406 | NODE_269_length_885_cov_2.22772  |
| KP28872 | case_1 | 27  | chromosomal | 0.966 | 0.034 | NODE_27_length_84436_cov_34.0821 |
| KP28872 | case_1 | 270 | chromosomal | 0.714 | 0.286 | NODE_270_length_848_cov_2.89883  |
| KP28872 | case_1 | 271 | chromosomal | 0.596 | 0.404 | NODE_271_length_821_cov_1.82661  |
| KP28872 | case_1 | 272 | chromosomal | 0.687 | 0.313 | NODE_272_length_820_cov_4.68102  |
| KP28872 | case_1 | 273 | plasmid     | 0     | 1     | NODE_273_length_820_cov_145.094  |
| KP28872 | case_1 | 274 | chromosomal | 0.691 | 0.309 | NODE_274_length_818_cov_3.00405  |
| KP28872 | case_1 | 275 | chromosomal | 0.621 | 0.379 | NODE_275_length_798_cov_2.01664  |
| KP28872 | case_1 | 276 | chromosomal | 0.707 | 0.293 | NODE_276_length_791_cov_4.34734  |
| KP28872 | case_1 | 277 | chromosomal | 0.591 | 0.409 | NODE_277_length_775_cov_2.47421  |
| KP28872 | case_1 | 278 | chromosomal | 0.948 | 0.052 | NODE_278_length_757_cov_141.529  |
| KP28872 | case_1 | 279 | chromosomal | 0.64  | 0.36  | NODE_279_length_754_cov_1.9099   |
| KP28872 | case_1 | 28  | chromosomal | 0.959 | 0.041 | NODE_28_length_77896_cov_39.5339 |
| KP28872 | case_1 | 280 | chromosomal | 0.705 | 0.295 | NODE_280_length_744_cov_4.69565  |
| KP28872 | case_1 | 281 | chromosomal | 0.724 | 0.276 | NODE_281_length_741_cov_2.61145  |
| KP28872 | case_1 | 282 | chromosomal | 0.567 | 0.433 | NODE_282_length_740_cov_2.03017  |
| KP28872 | case_1 | 283 | chromosomal | 0.652 | 0.348 | NODE_283_length_727_cov_31.3     |
| KP28872 | case_1 | 284 | chromosomal | 0.719 | 0.281 | NODE_284_length_715_cov_3.05172  |
| KP28872 | case_1 | 285 | chromosomal | 0.571 | 0.429 | NODE_285_length_715_cov_2.26019  |
| KP28872 | case_1 | 286 | chromosomal | 0.722 | 0.278 | NODE_286_length_708_cov_3.27575  |
| KP28872 | case_1 | 287 | chromosomal | 0.586 | 0.414 | NODE_287_length_700_cov_2.76244  |
| KP28872 | case_1 | 288 | plasmid     | 0.5   | 0.5   | NODE_288_length_683_cov_0.942244 |
| KP28872 | case_1 | 289 | chromosomal | 0.708 | 0.292 | NODE_289_length_682_cov_1.20661  |
| KP28872 | case_1 | 29  | chromosomal | 0.981 | 0.019 | NODE_29_length_76370_cov_41.0225 |
| KP28872 | case_1 | 290 | chromosomal | 0.68  | 0.32  | NODE_290_length_669_cov_1.36824  |
| KP28872 | case_1 | 291 | chromosomal | 0.647 | 0.353 | NODE_291_length_669_cov_40.9949  |
| KP28872 | case_1 | 292 | chromosomal | 0.629 | 0.371 | NODE_292_length_668_cov_2.16244  |
| KP28872 | case_1 | 293 | chromosomal | 0.639 | 0.361 | NODE_293_length_666_cov_2.71986  |
| KP28872 | case_1 | 294 | chromosomal | 0.621 | 0.379 | NODE_294_length_664_cov_2.30153  |
| KP28872 | case_1 | 295 | chromosomal | 0.601 | 0.399 | NODE_295_length_664_cov_1.65247  |
| KP28872 | case_1 | 296 | chromosomal | 0.552 | 0.448 | NODE_296_length_643_cov_3.37809  |
| KP28872 | case_1 | 297 | chromosomal | 0.73  | 0.27  | NODE_297_length_632_cov_2.66486  |
| KP28872 | case_1 | 298 | chromosomal | 0.599 | 0.401 | NODE_298_length_625_cov_2.48723  |

## Supplementary Materials

|         |        |     |             |       |       |                                  |
|---------|--------|-----|-------------|-------|-------|----------------------------------|
| KP28872 | case_1 | 299 | chromosomal | 0.514 | 0.486 | NODE_299_length_621_cov_4.38051  |
| KP28872 | case_1 | 3   | chromosomal | 1     | 0     | NODE_3_length_260172_cov_39.2366 |
| KP28872 | case_1 | 30  | chromosomal | 0.962 | 0.038 | NODE_30_length_71673_cov_98.3973 |
| KP28872 | case_1 | 300 | chromosomal | 0.508 | 0.492 | NODE_300_length_619_cov_2.56458  |
| KP28872 | case_1 | 301 | chromosomal | 0.861 | 0.139 | NODE_301_length_610_cov_78.94    |
| KP28872 | case_1 | 302 | chromosomal | 0.599 | 0.401 | NODE_302_length_609_cov_2.67857  |
| KP28872 | case_1 | 303 | chromosomal | 0.557 | 0.443 | NODE_303_length_609_cov_2.17857  |
| KP28872 | case_1 | 304 | plasmid     | 0.474 | 0.526 | NODE_304_length_607_cov_48.9057  |
| KP28872 | case_1 | 305 | chromosomal | 0.639 | 0.361 | NODE_305_length_585_cov_3.99016  |
| KP28872 | case_1 | 306 | chromosomal | 0.756 | 0.244 | NODE_306_length_558_cov_3.24948  |
| KP28872 | case_1 | 307 | chromosomal | 0.765 | 0.235 | NODE_307_length_528_cov_1.62749  |
| KP28872 | case_1 | 308 | chromosomal | 0.617 | 0.383 | NODE_308_length_518_cov_1.26077  |
| KP28872 | case_1 | 309 | chromosomal | 0.66  | 0.34  | NODE_309_length_508_cov_2.96752  |
| KP28872 | case_1 | 31  | chromosomal | 0.959 | 0.041 | NODE_31_length_62746_cov_96.3854 |
| KP28872 | case_1 | 310 | chromosomal | 0.66  | 0.34  | NODE_310_length_506_cov_2.04895  |
| KP28872 | case_1 | 311 | chromosomal | 0.671 | 0.329 | NODE_311_length_505_cov_3.07944  |
| KP28872 | case_1 | 312 | plasmid     | 0.099 | 0.901 | NODE_312_length_491_cov_90.2609  |
| KP28872 | case_1 | 313 | chromosomal | 0.576 | 0.424 | NODE_313_length_488_cov_3.29197  |
| KP28872 | case_1 | 314 | chromosomal | 0.663 | 0.337 | NODE_314_length_479_cov_24.3333  |
| KP28872 | case_1 | 315 | chromosomal | 0.611 | 0.389 | NODE_315_length_462_cov_1.29091  |
| KP28872 | case_1 | 316 | chromosomal | 0.668 | 0.332 | NODE_316_length_454_cov_1.76127  |
| KP28872 | case_1 | 317 | chromosomal | 0.688 | 0.312 | NODE_317_length_447_cov_3.09459  |
| KP28872 | case_1 | 318 | chromosomal | 0.559 | 0.441 | NODE_318_length_445_cov_1.20924  |
| KP28872 | case_1 | 319 | chromosomal | 0.606 | 0.394 | NODE_319_length_436_cov_2.8468   |
| KP28872 | case_1 | 32  | chromosomal | 0.987 | 0.013 | NODE_32_length_58974_cov_37.9615 |
| KP28872 | case_1 | 320 | chromosomal | 0.623 | 0.377 | NODE_320_length_436_cov_2.14485  |
| KP28872 | case_1 | 321 | chromosomal | 0.625 | 0.375 | NODE_321_length_428_cov_1.66382  |
| KP28872 | case_1 | 322 | chromosomal | 0.617 | 0.383 | NODE_322_length_427_cov_2.62571  |
| KP28872 | case_1 | 323 | chromosomal | 0.682 | 0.318 | NODE_323_length_422_cov_2.51304  |
| KP28872 | case_1 | 324 | chromosomal | 0.715 | 0.285 | NODE_324_length_418_cov_4.22287  |
| KP28872 | case_1 | 325 | chromosomal | 0.574 | 0.426 | NODE_325_length_405_cov_3.60671  |
| KP28872 | case_1 | 326 | chromosomal | 0.661 | 0.339 | NODE_326_length_395_cov_0.981132 |
| KP28872 | case_1 | 327 | chromosomal | 0.679 | 0.321 | NODE_327_length_394_cov_0.974763 |
| KP28872 | case_1 | 328 | chromosomal | 0.65  | 0.35  | NODE_328_length_386_cov_30.9256  |
| KP28872 | case_1 | 329 | chromosomal | 0.564 | 0.436 | NODE_329_length_385_cov_0.987013 |
| KP28872 | case_1 | 33  | chromosomal | 0.907 | 0.093 | NODE_33_length_50217_cov_28.9361 |
| KP28872 | case_1 | 330 | chromosomal | 0.642 | 0.358 | NODE_330_length_381_cov_1.06908  |
| KP28872 | case_1 | 331 | chromosomal | 0.712 | 0.288 | NODE_331_length_380_cov_0.953795 |
| KP28872 | case_1 | 332 | chromosomal | 0.677 | 0.323 | NODE_332_length_380_cov_2.28383  |
| KP28872 | case_1 | 333 | chromosomal | 0.642 | 0.358 | NODE_333_length_377_cov_0.986667 |
| KP28872 | case_1 | 334 | chromosomal | 0.658 | 0.342 | NODE_334_length_374_cov_1.6431   |
| KP28872 | case_1 | 335 | chromosomal | 0.618 | 0.382 | NODE_335_length_374_cov_3.61616  |
| KP28872 | case_1 | 336 | chromosomal | 0.642 | 0.358 | NODE_336_length_373_cov_1.01351  |
| KP28872 | case_1 | 337 | chromosomal | 0.687 | 0.313 | NODE_337_length_373_cov_3.30405  |
| KP28872 | case_1 | 338 | chromosomal | 0.668 | 0.332 | NODE_338_length_368_cov_1.51546  |
| KP28872 | case_1 | 339 | chromosomal | 0.682 | 0.318 | NODE_339_length_368_cov_1.34708  |
| KP28872 | case_1 | 34  | plasmid     | 0.038 | 0.962 | NODE_34_length_45797_cov_21.1749 |
| KP28872 | case_1 | 340 | chromosomal | 0.597 | 0.403 | NODE_340_length_367_cov_0.975862 |
| KP28872 | case_1 | 341 | chromosomal | 0.559 | 0.441 | NODE_341_length_366_cov_2.06574  |
| KP28872 | case_1 | 342 | chromosomal | 0.613 | 0.387 | NODE_342_length_360_cov_1.08127  |
| KP28872 | case_1 | 343 | chromosomal | 0.659 | 0.341 | NODE_343_length_359_cov_2.20922  |
| KP28872 | case_1 | 344 | chromosomal | 0.597 | 0.403 | NODE_344_length_358_cov_1.13167  |
| KP28872 | case_1 | 345 | chromosomal | 0.644 | 0.356 | NODE_345_length_358_cov_1.32028  |
| KP28872 | case_1 | 346 | chromosomal | 0.695 | 0.305 | NODE_346_length_357_cov_1.81071  |
| KP28872 | case_1 | 347 | chromosomal | 0.597 | 0.403 | NODE_347_length_357_cov_0.985714 |
| KP28872 | case_1 | 348 | chromosomal | 0.677 | 0.323 | NODE_348_length_356_cov_2.17921  |

## Supplementary Materials

|         |        |     |             |       |       |                                  |
|---------|--------|-----|-------------|-------|-------|----------------------------------|
| KP28872 | case_1 | 349 | chromosomal | 0.686 | 0.314 | NODE_349_length_352_cov_2.09455  |
| KP28872 | case_1 | 35  | plasmid     | 0.019 | 0.981 | NODE_35_length_42433_cov_19.7452 |
| KP28872 | case_1 | 350 | chromosomal | 0.659 | 0.341 | NODE_350_length_351_cov_2.08394  |
| KP28872 | case_1 | 351 | chromosomal | 0.613 | 0.387 | NODE_351_length_350_cov_1.85348  |
| KP28872 | case_1 | 352 | chromosomal | 0.622 | 0.378 | NODE_352_length_348_cov_0.9631   |
| KP28872 | case_1 | 353 | chromosomal | 0.634 | 0.366 | NODE_353_length_346_cov_3.5948   |
| KP28872 | case_1 | 354 | chromosomal | 0.622 | 0.378 | NODE_354_length_345_cov_1.08209  |
| KP28872 | case_1 | 355 | chromosomal | 0.578 | 0.422 | NODE_355_length_344_cov_1.01873  |
| KP28872 | case_1 | 356 | chromosomal | 0.678 | 0.322 | NODE_356_length_343_cov_2.13534  |
| KP28872 | case_1 | 357 | chromosomal | 0.623 | 0.377 | NODE_357_length_338_cov_1.2069   |
| KP28872 | case_1 | 358 | chromosomal | 0.842 | 0.158 | NODE_358_length_338_cov_145.402  |
| KP28872 | case_1 | 359 | chromosomal | 0.682 | 0.318 | NODE_359_length_336_cov_1.0888   |
| KP28872 | case_1 | 36  | chromosomal | 0.975 | 0.025 | NODE_36_length_40905_cov_37.1967 |
| KP28872 | case_1 | 360 | plasmid     | 0.294 | 0.706 | NODE_360_length_332_cov_27.4275  |
| KP28872 | case_1 | 361 | chromosomal | 0.689 | 0.311 | NODE_361_length_303_cov_40.4027  |
| KP28872 | case_1 | 362 | chromosomal | 0.585 | 0.415 | NODE_362_length_217_cov_38.4714  |
| KP28872 | case_1 | 363 | chromosomal | 0.724 | 0.276 | NODE_363_length_207_cov_92.3923  |
| KP28872 | case_1 | 364 | chromosomal | 0.715 | 0.285 | NODE_364_length_202_cov_48.192   |
| KP28872 | case_1 | 365 | chromosomal | 0.744 | 0.256 | NODE_365_length_201_cov_32.6452  |
| KP28872 | case_1 | 366 | chromosomal | 0.653 | 0.347 | NODE_366_length_197_cov_56.5833  |
| KP28872 | case_1 | 367 | chromosomal | 0.582 | 0.418 | NODE_367_length_188_cov_72.2973  |
| KP28872 | case_1 | 368 | chromosomal | 0.641 | 0.359 | NODE_368_length_188_cov_49.2793  |
| KP28872 | case_1 | 369 | chromosomal | 0.578 | 0.422 | NODE_369_length_186_cov_34.8257  |
| KP28872 | case_1 | 37  | plasmid     | 0.133 | 0.867 | NODE_37_length_37136_cov_21.0137 |
| KP28872 | case_1 | 370 | chromosomal | 0.71  | 0.29  | NODE_370_length_182_cov_99.4476  |
| KP28872 | case_1 | 371 | chromosomal | 0.615 | 0.385 | NODE_371_length_177_cov_66.07    |
| KP28872 | case_1 | 372 | chromosomal | 0.637 | 0.363 | NODE_372_length_176_cov_26.3131  |
| KP28872 | case_1 | 373 | chromosomal | 0.617 | 0.383 | NODE_373_length_157_cov_42.575   |
| KP28872 | case_1 | 374 | chromosomal | 0.716 | 0.284 | NODE_374_length_156_cov_107.114  |
| KP28872 | case_1 | 375 | chromosomal | 0.71  | 0.29  | NODE_375_length_156_cov_177.709  |
| KP28872 | case_1 | 376 | chromosomal | 0.588 | 0.412 | NODE_376_length_152_cov_40.2933  |
| KP28872 | case_1 | 377 | chromosomal | 0.608 | 0.392 | NODE_377_length_152_cov_24       |
| KP28872 | case_1 | 378 | chromosomal | 0.62  | 0.38  | NODE_378_length_142_cov_84.4154  |
| KP28872 | case_1 | 379 | chromosomal | 0.602 | 0.398 | NODE_379_length_121_cov_173.364  |
| KP28872 | case_1 | 38  | chromosomal | 0.997 | 0.003 | NODE_38_length_34549_cov_40.0918 |
| KP28872 | case_1 | 380 | chromosomal | 0.751 | 0.249 | NODE_380_length_120_cov_1.62791  |
| KP28872 | case_1 | 381 | chromosomal | 0.751 | 0.249 | NODE_381_length_120_cov_30.3721  |
| KP28872 | case_1 | 382 | chromosomal | 0.668 | 0.332 | NODE_382_length_109_cov_42.2812  |
| KP28872 | case_1 | 383 | chromosomal | 0.615 | 0.385 | NODE_383_length_101_cov_117.625  |
| KP28872 | case_1 | 384 | chromosomal | 0.632 | 0.368 | NODE_384_length_96_cov_105.368   |
| KP28872 | case_1 | 385 | chromosomal | 0.649 | 0.351 | NODE_385_length_89_cov_32.6667   |
| KP28872 | case_1 | 386 | chromosomal | 0.627 | 0.373 | NODE_386_length_87_cov_41.3      |
| KP28872 | case_1 | 387 | chromosomal | 0.675 | 0.325 | NODE_387_length_85_cov_39        |
| KP28872 | case_1 | 388 | chromosomal | 0.772 | 0.228 | NODE_388_length_85_cov_329.5     |
| KP28872 | case_1 | 389 | chromosomal | 0.66  | 0.34  | NODE_389_length_79_cov_181.5     |
| KP28872 | case_1 | 39  | chromosomal | 0.77  | 0.23  | NODE_39_length_34472_cov_31.157  |
| KP28872 | case_1 | 390 | chromosomal | 0.847 | 0.153 | NODE_390_length_78_cov_76        |
| KP28872 | case_1 | 391 | chromosomal | 0.583 | 0.417 | NODE_391_length_78_cov_121       |
| KP28872 | case_1 | 4   | chromosomal | 1     | 0     | NODE_4_length_230310_cov_35.9925 |
| KP28872 | case_1 | 40  | chromosomal | 0.909 | 0.091 | NODE_40_length_33913_cov_38.9698 |
| KP28872 | case_1 | 41  | chromosomal | 0.646 | 0.354 | NODE_41_length_31841_cov_27.2008 |
| KP28872 | case_1 | 42  | chromosomal | 0.932 | 0.068 | NODE_42_length_29764_cov_38.9923 |
| KP28872 | case_1 | 43  | chromosomal | 0.944 | 0.056 | NODE_43_length_28468_cov_34.8087 |
| KP28872 | case_1 | 44  | chromosomal | 0.994 | 0.006 | NODE_44_length_26346_cov_38.1109 |
| KP28872 | case_1 | 45  | chromosomal | 0.771 | 0.229 | NODE_45_length_23398_cov_27.2035 |
| KP28872 | case_1 | 46  | chromosomal | 0.665 | 0.335 | NODE_46_length_23195_cov_39.9896 |



## Supplementary Materials

|         |        |    |             |       |       |                                  |
|---------|--------|----|-------------|-------|-------|----------------------------------|
| KP28872 | case_1 | 47 | chromosomal | 0.574 | 0.426 | NODE_47_length_22463_cov_32.9732 |
| KP28872 | case_1 | 48 | chromosomal | 0.952 | 0.048 | NODE_48_length_20303_cov_42.5318 |
| KP28872 | case_1 | 49 | chromosomal | 0.906 | 0.094 | NODE_49_length_19579_cov_39.8777 |
| KP28872 | case_1 | 5  | chromosomal | 0.995 | 0.005 | NODE_5_length_228449_cov_35.4333 |
| KP28872 | case_1 | 50 | chromosomal | 0.547 | 0.453 | NODE_50_length_19359_cov_4.40763 |
| KP28872 | case_1 | 51 | chromosomal | 0.867 | 0.133 | NODE_51_length_19046_cov_43.0785 |
| KP28872 | case_1 | 52 | plasmid     | 0.009 | 0.991 | NODE_52_length_16943_cov_14.2677 |
| KP28872 | case_1 | 53 | chromosomal | 0.77  | 0.23  | NODE_53_length_15431_cov_4.48815 |
| KP28872 | case_1 | 54 | plasmid     | 0.436 | 0.564 | NODE_54_length_14967_cov_35.5692 |
| KP28872 | case_1 | 55 | chromosomal | 0.831 | 0.169 | NODE_55_length_14763_cov_38.155  |
| KP28872 | case_1 | 56 | chromosomal | 0.901 | 0.099 | NODE_56_length_13828_cov_37.5022 |
| KP28872 | case_1 | 57 | chromosomal | 0.895 | 0.105 | NODE_57_length_13789_cov_32.8689 |
| KP28872 | case_1 | 58 | plasmid     | 0.103 | 0.897 | NODE_58_length_13687_cov_13.536  |
| KP28872 | case_1 | 59 | plasmid     | 0.081 | 0.919 | NODE_59_length_11614_cov_21.6892 |
| KP28872 | case_1 | 6  | chromosomal | 0.998 | 0.002 | NODE_6_length_203863_cov_36.4848 |
| KP28872 | case_1 | 60 | chromosomal | 0.864 | 0.136 | NODE_60_length_10594_cov_4.70533 |
| KP28872 | case_1 | 61 | chromosomal | 0.728 | 0.272 | NODE_61_length_10396_cov_4.66276 |
| KP28872 | case_1 | 62 | plasmid     | 0.43  | 0.57  | NODE_62_length_10267_cov_4.3949  |
| KP28872 | case_1 | 63 | chromosomal | 0.911 | 0.089 | NODE_63_length_9588_cov_33.8295  |
| KP28872 | case_1 | 64 | chromosomal | 0.724 | 0.276 | NODE_64_length_8827_cov_4.46914  |
| KP28872 | case_1 | 65 | chromosomal | 0.737 | 0.263 | NODE_65_length_8825_cov_4.01235  |
| KP28872 | case_1 | 66 | chromosomal | 0.83  | 0.17  | NODE_66_length_8614_cov_4.06958  |
| KP28872 | case_1 | 67 | chromosomal | 0.722 | 0.278 | NODE_67_length_7982_cov_37.0061  |
| KP28872 | case_1 | 68 | chromosomal | 0.857 | 0.143 | NODE_68_length_7826_cov_34.0514  |
| KP28872 | case_1 | 69 | chromosomal | 0.832 | 0.168 | NODE_69_length_7821_cov_4.72314  |
| KP28872 | case_1 | 7  | chromosomal | 0.996 | 0.004 | NODE_7_length_203049_cov_34.8131 |
| KP28872 | case_1 | 70 | plasmid     | 0.202 | 0.798 | NODE_70_length_7688_cov_20.5504  |
| KP28872 | case_1 | 71 | plasmid     | 0.443 | 0.557 | NODE_71_length_7445_cov_3.36767  |
| KP28872 | case_1 | 72 | chromosomal | 0.882 | 0.118 | NODE_72_length_7312_cov_4.60705  |
| KP28872 | case_1 | 73 | chromosomal | 0.691 | 0.309 | NODE_73_length_6967_cov_5.51466  |
| KP28872 | case_1 | 74 | plasmid     | 0.052 | 0.948 | NODE_74_length_6916_cov_24.628   |
| KP28872 | case_1 | 75 | chromosomal | 0.673 | 0.327 | NODE_75_length_6686_cov_6.00999  |
| KP28872 | case_1 | 76 | plasmid     | 0.042 | 0.958 | NODE_76_length_6551_cov_10.9166  |
| KP28872 | case_1 | 77 | plasmid     | 0.239 | 0.761 | NODE_77_length_6167_cov_22.7044  |
| KP28872 | case_1 | 78 | chromosomal | 0.591 | 0.409 | NODE_78_length_5964_cov_25.4296  |
| KP28872 | case_1 | 79 | plasmid     | 0.224 | 0.776 | NODE_79_length_5859_cov_25.647   |
| KP28872 | case_1 | 8  | chromosomal | 0.993 | 0.007 | NODE_8_length_190620_cov_41.9811 |
| KP28872 | case_1 | 80 | chromosomal | 0.88  | 0.12  | NODE_80_length_5449_cov_4.15004  |
| KP28872 | case_1 | 81 | chromosomal | 0.815 | 0.185 | NODE_81_length_5391_cov_3.85566  |
| KP28872 | case_1 | 82 | chromosomal | 0.893 | 0.107 | NODE_82_length_5263_cov_4.15947  |
| KP28872 | case_1 | 83 | chromosomal | 0.898 | 0.102 | NODE_83_length_5250_cov_4.607    |
| KP28872 | case_1 | 84 | plasmid     | 0.037 | 0.963 | NODE_84_length_5212_cov_29.0715  |
| KP28872 | case_1 | 85 | plasmid     | 0.324 | 0.676 | NODE_85_length_5208_cov_3.69577  |
| KP28872 | case_1 | 86 | chromosomal | 0.925 | 0.075 | NODE_86_length_5160_cov_4.06532  |
| KP28872 | case_1 | 87 | chromosomal | 0.753 | 0.247 | NODE_87_length_4901_cov_4.31219  |
| KP28872 | case_1 | 88 | plasmid     | 0.36  | 0.64  | NODE_88_length_4782_cov_3.88842  |
| KP28872 | case_1 | 89 | plasmid     | 0.14  | 0.86  | NODE_89_length_4667_cov_12.5203  |
| KP28872 | case_1 | 9  | chromosomal | 0.996 | 0.004 | NODE_9_length_177480_cov_42.0453 |
| KP28872 | case_1 | 90 | chromosomal | 0.636 | 0.364 | NODE_90_length_4654_cov_3.92659  |
| KP28872 | case_1 | 91 | chromosomal | 0.605 | 0.395 | NODE_91_length_4635_cov_4.72159  |
| KP28872 | case_1 | 92 | chromosomal | 0.85  | 0.15  | NODE_92_length_4621_cov_5.67826  |
| KP28872 | case_1 | 93 | plasmid     | 0.475 | 0.525 | NODE_93_length_4506_cov_19.8607  |
| KP28872 | case_1 | 94 | chromosomal | 0.722 | 0.278 | NODE_94_length_4482_cov_3.9807   |
| KP28872 | case_1 | 95 | chromosomal | 0.763 | 0.237 | NODE_95_length_4393_cov_4.24351  |
| KP28872 | case_1 | 96 | chromosomal | 0.747 | 0.253 | NODE_96_length_4307_cov_26.1305  |
| KP28872 | case_1 | 97 | chromosomal | 0.844 | 0.156 | NODE_97_length_4213_cov_4.23042  |

## Supplementary Materials

|         |        |     |             |       |       |                                   |
|---------|--------|-----|-------------|-------|-------|-----------------------------------|
| KP28872 | case_1 | 98  | chromosomal | 0.811 | 0.189 | NODE_98_length_4107_cov_3.78983   |
| KP28872 | case_1 | 99  | chromosomal | 0.814 | 0.186 | NODE_99_length_4104_cov_3.77204   |
| KP28873 | case_2 | 1   | chromosomal | 1     | 0     | NODE_1_length_355714_cov_24.3492  |
| KP28873 | case_2 | 10  | chromosomal | 0.99  | 0.01  | NODE_10_length_159341_cov_22.3163 |
| KP28873 | case_2 | 100 | chromosomal | 0.606 | 0.394 | NODE_100_length_557_cov_19.8833   |
| KP28873 | case_2 | 101 | chromosomal | 0.663 | 0.337 | NODE_101_length_479_cov_18.2313   |
| KP28873 | case_2 | 102 | chromosomal | 0.888 | 0.112 | NODE_102_length_447_cov_80.5811   |
| KP28873 | case_2 | 103 | chromosomal | 0.609 | 0.391 | NODE_103_length_433_cov_34.0197   |
| KP28873 | case_2 | 104 | chromosomal | 0.65  | 0.35  | NODE_104_length_386_cov_23.89     |
| KP28873 | case_2 | 105 | chromosomal | 0.673 | 0.327 | NODE_105_length_365_cov_19.0278   |
| KP28873 | case_2 | 106 | chromosomal | 0.876 | 0.124 | NODE_106_length_338_cov_100.479   |
| KP28873 | case_2 | 107 | chromosomal | 0.586 | 0.414 | NODE_107_length_333_cov_51.2734   |
| KP28873 | case_2 | 108 | chromosomal | 0.688 | 0.312 | NODE_108_length_301_cov_28.8348   |
| KP28873 | case_2 | 109 | plasmid     | 0.497 | 0.503 | NODE_109_length_291_cov_13.3178   |
| KP28873 | case_2 | 11  | chromosomal | 0.988 | 0.012 | NODE_11_length_156887_cov_20.8155 |
| KP28873 | case_2 | 110 | plasmid     | 0.275 | 0.725 | NODE_110_length_277_cov_12.07     |
| KP28873 | case_2 | 111 | chromosomal | 0.709 | 0.291 | NODE_111_length_269_cov_22.9531   |
| KP28873 | case_2 | 112 | chromosomal | 0.768 | 0.232 | NODE_112_length_251_cov_41.092    |
| KP28873 | case_2 | 113 | chromosomal | 0.645 | 0.355 | NODE_113_length_241_cov_20.1159   |
| KP28873 | case_2 | 114 | chromosomal | 0.764 | 0.236 | NODE_114_length_215_cov_25.7609   |
| KP28873 | case_2 | 115 | chromosomal | 0.724 | 0.276 | NODE_115_length_207_cov_20.0692   |
| KP28873 | case_2 | 116 | chromosomal | 0.634 | 0.366 | NODE_116_length_205_cov_22.1172   |
| KP28873 | case_2 | 117 | chromosomal | 0.622 | 0.378 | NODE_117_length_195_cov_33.1102   |
| KP28873 | case_2 | 118 | chromosomal | 0.585 | 0.415 | NODE_118_length_195_cov_81.0513   |
| KP28873 | case_2 | 119 | chromosomal | 0.627 | 0.373 | NODE_119_length_193_cov_17.3276   |
| KP28873 | case_2 | 12  | chromosomal | 0.999 | 0.001 | NODE_12_length_148201_cov_25.4964 |
| KP28873 | case_2 | 120 | chromosomal | 0.553 | 0.447 | NODE_120_length_188_cov_20.027    |
| KP28873 | case_2 | 121 | chromosomal | 0.62  | 0.38  | NODE_121_length_185_cov_26.4722   |
| KP28873 | case_2 | 122 | chromosomal | 0.625 | 0.375 | NODE_122_length_183_cov_28.2547   |
| KP28873 | case_2 | 123 | chromosomal | 0.586 | 0.414 | NODE_123_length_179_cov_42.1667   |
| KP28873 | case_2 | 124 | chromosomal | 0.654 | 0.346 | NODE_124_length_169_cov_26.4457   |
| KP28873 | case_2 | 125 | plasmid     | 0.48  | 0.52  | NODE_125_length_153_cov_10.6711   |
| KP28873 | case_2 | 126 | chromosomal | 0.568 | 0.432 | NODE_126_length_150_cov_18.7123   |
| KP28873 | case_2 | 127 | chromosomal | 0.62  | 0.38  | NODE_127_length_133_cov_37.6      |
| KP28873 | case_2 | 128 | chromosomal | 0.607 | 0.393 | NODE_128_length_128_cov_50.6471   |
| KP28873 | case_2 | 129 | chromosomal | 0.735 | 0.265 | NODE_129_length_120_cov_24.8372   |
| KP28873 | case_2 | 13  | chromosomal | 0.996 | 0.004 | NODE_13_length_144891_cov_25.4965 |
| KP28873 | case_2 | 130 | plasmid     | 0.242 | 0.758 | NODE_130_length_118_cov_14.1951   |
| KP28873 | case_2 | 131 | plasmid     | 0.253 | 0.747 | NODE_131_length_114_cov_13.7568   |
| KP28873 | case_2 | 132 | chromosomal | 0.619 | 0.381 | NODE_132_length_107_cov_36.9333   |
| KP28873 | case_2 | 133 | chromosomal | 0.618 | 0.382 | NODE_133_length_104_cov_29.8889   |
| KP28873 | case_2 | 134 | chromosomal | 0.615 | 0.385 | NODE_134_length_101_cov_88.7083   |
| KP28873 | case_2 | 135 | chromosomal | 0.586 | 0.414 | NODE_135_length_96_cov_17.5263    |
| KP28873 | case_2 | 136 | plasmid     | 0.371 | 0.629 | NODE_136_length_95_cov_25.8889    |
| KP28873 | case_2 | 137 | chromosomal | 0.636 | 0.364 | NODE_137_length_94_cov_20.4706    |
| KP28873 | case_2 | 138 | plasmid     | 0.198 | 0.802 | NODE_138_length_92_cov_13.6       |
| KP28873 | case_2 | 139 | chromosomal | 0.649 | 0.351 | NODE_139_length_89_cov_25.75      |
| KP28873 | case_2 | 14  | chromosomal | 0.99  | 0.01  | NODE_14_length_139101_cov_22.6223 |
| KP28873 | case_2 | 140 | chromosomal | 0.623 | 0.377 | NODE_140_length_88_cov_54.2727    |
| KP28873 | case_2 | 141 | chromosomal | 0.772 | 0.228 | NODE_141_length_85_cov_77.75      |
| KP28873 | case_2 | 142 | plasmid     | 0.239 | 0.761 | NODE_142_length_81_cov_12         |
| KP28873 | case_2 | 143 | chromosomal | 0.657 | 0.343 | NODE_143_length_81_cov_68.75      |
| KP28873 | case_2 | 144 | chromosomal | 0.573 | 0.427 | NODE_144_length_79_cov_48         |
| KP28873 | case_2 | 145 | chromosomal | 0.744 | 0.256 | NODE_145_length_79_cov_46         |
| KP28873 | case_2 | 146 | chromosomal | 0.833 | 0.167 | NODE_146_length_78_cov_19         |
| KP28873 | case_2 | 147 | chromosomal | 0.583 | 0.417 | NODE_147_length_78_cov_72         |

## Supplementary Materials

|         |        |    |             |       |       |                                   |
|---------|--------|----|-------------|-------|-------|-----------------------------------|
| KP28873 | case_2 | 15 | chromosomal | 0.982 | 0.018 | NODE_15_length_126807_cov_24.1097 |
| KP28873 | case_2 | 16 | chromosomal | 0.962 | 0.038 | NODE_16_length_126338_cov_20.7626 |
| KP28873 | case_2 | 17 | chromosomal | 0.992 | 0.008 | NODE_17_length_108526_cov_21.4616 |
| KP28873 | case_2 | 18 | chromosomal | 0.996 | 0.004 | NODE_18_length_105981_cov_24.7089 |
| KP28873 | case_2 | 19 | chromosomal | 0.629 | 0.371 | NODE_19_length_104776_cov_21.3949 |
| KP28873 | case_2 | 2  | chromosomal | 0.998 | 0.002 | NODE_2_length_292612_cov_23.6881  |
| KP28873 | case_2 | 20 | chromosomal | 0.996 | 0.004 | NODE_20_length_100509_cov_26.3039 |
| KP28873 | case_2 | 21 | chromosomal | 0.986 | 0.014 | NODE_21_length_99297_cov_25.1373  |
| KP28873 | case_2 | 22 | chromosomal | 0.999 | 0.001 | NODE_22_length_94236_cov_25.7175  |
| KP28873 | case_2 | 23 | chromosomal | 0.975 | 0.025 | NODE_23_length_90092_cov_24.1148  |
| KP28873 | case_2 | 24 | chromosomal | 0.991 | 0.009 | NODE_24_length_88599_cov_25.2866  |
| KP28873 | case_2 | 25 | chromosomal | 1     | 0     | NODE_25_length_86605_cov_24.9395  |
| KP28873 | case_2 | 26 | chromosomal | 0.981 | 0.019 | NODE_26_length_85248_cov_25.2298  |
| KP28873 | case_2 | 27 | chromosomal | 0.965 | 0.035 | NODE_27_length_84334_cov_20.8779  |
| KP28873 | case_2 | 28 | chromosomal | 0.981 | 0.019 | NODE_28_length_76440_cov_26.1857  |
| KP28873 | case_2 | 29 | chromosomal | 0.752 | 0.248 | NODE_29_length_72276_cov_23.3432  |
| KP28873 | case_2 | 3  | chromosomal | 0.984 | 0.016 | NODE_3_length_232248_cov_20.9202  |
| KP28873 | case_2 | 30 | chromosomal | 0.962 | 0.038 | NODE_30_length_71671_cov_23.8972  |
| KP28873 | case_2 | 31 | chromosomal | 0.944 | 0.056 | NODE_31_length_68754_cov_21.9329  |
| KP28873 | case_2 | 32 | plasmid     | 0.012 | 0.988 | NODE_32_length_63961_cov_15.848   |
| KP28873 | case_2 | 33 | chromosomal | 0.959 | 0.041 | NODE_33_length_62746_cov_23.7741  |
| KP28873 | case_2 | 34 | chromosomal | 0.987 | 0.013 | NODE_34_length_58972_cov_23.2093  |
| KP28873 | case_2 | 35 | chromosomal | 0.95  | 0.05  | NODE_35_length_58461_cov_23.7086  |
| KP28873 | case_2 | 36 | chromosomal | 0.96  | 0.04  | NODE_36_length_49594_cov_23.9551  |
| KP28873 | case_2 | 37 | plasmid     | 0.019 | 0.981 | NODE_37_length_42433_cov_13.9087  |
| KP28873 | case_2 | 38 | chromosomal | 0.874 | 0.126 | NODE_38_length_40271_cov_21.0941  |
| KP28873 | case_2 | 39 | plasmid     | 0.133 | 0.867 | NODE_39_length_37143_cov_14.4745  |
| KP28873 | case_2 | 4  | chromosomal | 1     | 0     | NODE_4_length_230166_cov_22.0558  |
| KP28873 | case_2 | 40 | chromosomal | 0.997 | 0.003 | NODE_40_length_34549_cov_26.4556  |
| KP28873 | case_2 | 41 | chromosomal | 0.77  | 0.23  | NODE_41_length_34470_cov_22.0205  |
| KP28873 | case_2 | 42 | chromosomal | 0.909 | 0.091 | NODE_42_length_33910_cov_22.6375  |
| KP28873 | case_2 | 43 | chromosomal | 0.645 | 0.355 | NODE_43_length_32801_cov_22.1719  |
| KP28873 | case_2 | 44 | chromosomal | 0.934 | 0.066 | NODE_44_length_29764_cov_24.4033  |
| KP28873 | case_2 | 45 | chromosomal | 0.944 | 0.056 | NODE_45_length_28468_cov_23.9624  |
| KP28873 | case_2 | 46 | chromosomal | 0.994 | 0.006 | NODE_46_length_26346_cov_26.3913  |
| KP28873 | case_2 | 47 | chromosomal | 0.898 | 0.102 | NODE_47_length_26159_cov_21.7188  |
| KP28873 | case_2 | 48 | chromosomal | 0.768 | 0.232 | NODE_48_length_24358_cov_20.5077  |
| KP28873 | case_2 | 49 | chromosomal | 0.665 | 0.335 | NODE_49_length_23195_cov_25.9969  |
| KP28873 | case_2 | 5  | chromosomal | 0.996 | 0.004 | NODE_5_length_210342_cov_20.2479  |
| KP28873 | case_2 | 50 | chromosomal | 0.593 | 0.407 | NODE_50_length_23028_cov_24.0916  |
| KP28873 | case_2 | 51 | chromosomal | 0.951 | 0.049 | NODE_51_length_20303_cov_26.2921  |
| KP28873 | case_2 | 52 | chromosomal | 0.887 | 0.113 | NODE_52_length_19654_cov_24.193   |
| KP28873 | case_2 | 53 | chromosomal | 0.867 | 0.133 | NODE_53_length_19046_cov_23.7692  |
| KP28873 | case_2 | 54 | plasmid     | 0.436 | 0.564 | NODE_54_length_14967_cov_22.6888  |
| KP28873 | case_2 | 55 | chromosomal | 0.895 | 0.105 | NODE_55_length_13789_cov_20.5869  |
| KP28873 | case_2 | 56 | plasmid     | 0.081 | 0.919 | NODE_56_length_11614_cov_14.9374  |
| KP28873 | case_2 | 57 | plasmid     | 0.107 | 0.893 | NODE_57_length_8499_cov_12.848    |
| KP28873 | case_2 | 58 | chromosomal | 0.853 | 0.147 | NODE_58_length_7896_cov_23.201    |
| KP28873 | case_2 | 59 | plasmid     | 0.136 | 0.864 | NODE_59_length_7362_cov_14.3065   |
| KP28873 | case_2 | 6  | chromosomal | 0.999 | 0.001 | NODE_6_length_203642_cov_23.1249  |
| KP28873 | case_2 | 60 | chromosomal | 0.892 | 0.108 | NODE_60_length_7357_cov_25.5636   |
| KP28873 | case_2 | 61 | plasmid     | 0.079 | 0.921 | NODE_61_length_7303_cov_11.0559   |
| KP28873 | case_2 | 62 | plasmid     | 0.13  | 0.87  | NODE_62_length_6896_cov_15.4263   |
| KP28873 | case_2 | 63 | plasmid     | 0.026 | 0.974 | NODE_63_length_6424_cov_15.2625   |
| KP28873 | case_2 | 64 | plasmid     | 0.239 | 0.761 | NODE_64_length_6167_cov_19.0051   |
| KP28873 | case_2 | 65 | plasmid     | 0.037 | 0.963 | NODE_65_length_5212_cov_21.6952   |

## Supplementary Materials

|         |        |    |             |       |       |                                  |
|---------|--------|----|-------------|-------|-------|----------------------------------|
| KP28873 | case_2 | 66 | chromosomal | 0.839 | 0.161 | NODE_66_length_4731_cov_20.3616  |
| KP28873 | case_2 | 67 | plasmid     | 0.14  | 0.86  | NODE_67_length_4667_cov_12.3839  |
| KP28873 | case_2 | 68 | plasmid     | 0.099 | 0.901 | NODE_68_length_4510_cov_10.5267  |
| KP28873 | case_2 | 69 | plasmid     | 0.481 | 0.519 | NODE_69_length_4504_cov_14.6869  |
| KP28873 | case_2 | 7  | chromosomal | 0.994 | 0.006 | NODE_7_length_190612_cov_25.6666 |
| KP28873 | case_2 | 70 | plasmid     | 0.129 | 0.871 | NODE_70_length_3827_cov_34.1757  |
| KP28873 | case_2 | 71 | chromosomal | 0.855 | 0.145 | NODE_71_length_3823_cov_25.3526  |
| KP28873 | case_2 | 72 | chromosomal | 0.781 | 0.219 | NODE_72_length_3299_cov_23.4863  |
| KP28873 | case_2 | 73 | chromosomal | 0.976 | 0.024 | NODE_73_length_3231_cov_240.086  |
| KP28873 | case_2 | 74 | plasmid     | 0.26  | 0.74  | NODE_74_length_2909_cov_16.2479  |
| KP28873 | case_2 | 75 | plasmid     | 0.397 | 0.603 | NODE_75_length_2751_cov_13.0079  |
| KP28873 | case_2 | 76 | plasmid     | 0.198 | 0.802 | NODE_76_length_2615_cov_14.184   |
| KP28873 | case_2 | 77 | chromosomal | 0.645 | 0.355 | NODE_77_length_2565_cov_10.3593  |
| KP28873 | case_2 | 78 | chromosomal | 0.64  | 0.36  | NODE_78_length_2438_cov_23.4312  |
| KP28873 | case_2 | 79 | plasmid     | 0.491 | 0.509 | NODE_79_length_2263_cov_16.6102  |
| KP28873 | case_2 | 8  | chromosomal | 0.997 | 0.003 | NODE_8_length_177371_cov_24.7878 |
| KP28873 | case_2 | 80 | plasmid     | 0.139 | 0.861 | NODE_80_length_1915_cov_135.554  |
| KP28873 | case_2 | 81 | plasmid     | 0.197 | 0.803 | NODE_81_length_1912_cov_15.3292  |
| KP28873 | case_2 | 82 | chromosomal | 0.983 | 0.017 | NODE_82_length_1888_cov_42.6052  |
| KP28873 | case_2 | 83 | chromosomal | 0.984 | 0.016 | NODE_83_length_1711_cov_237.209  |
| KP28873 | case_2 | 84 | plasmid     | 0.291 | 0.709 | NODE_84_length_1632_cov_10.2695  |
| KP28873 | case_2 | 85 | chromosomal | 0.761 | 0.239 | NODE_85_length_1531_cov_39.2221  |
| KP28873 | case_2 | 86 | chromosomal | 0.999 | 0.001 | NODE_86_length_1445_cov_95.0972  |
| KP28873 | case_2 | 87 | plasmid     | 0.016 | 0.984 | NODE_87_length_1356_cov_25.154   |
| KP28873 | case_2 | 88 | plasmid     | 0.088 | 0.912 | NODE_88_length_1221_cov_260.223  |
| KP28873 | case_2 | 89 | plasmid     | 0.357 | 0.643 | NODE_89_length_1196_cov_199.941  |
| KP28873 | case_2 | 9  | chromosomal | 0.998 | 0.002 | NODE_9_length_174527_cov_22.6858 |
| KP28873 | case_2 | 90 | chromosomal | 0.794 | 0.206 | NODE_90_length_1173_cov_45.0465  |
| KP28873 | case_2 | 91 | chromosomal | 0.506 | 0.494 | NODE_91_length_1169_cov_9.91484  |
| KP28873 | case_2 | 92 | chromosomal | 0.848 | 0.152 | NODE_92_length_1096_cov_31.4779  |
| KP28873 | case_2 | 93 | plasmid     | 0.131 | 0.869 | NODE_93_length_909_cov_14.929    |
| KP28873 | case_2 | 94 | plasmid     | 0.231 | 0.769 | NODE_94_length_1060_cov_45.5117  |
| KP28873 | case_2 | 95 | chromosomal | 0.996 | 0.004 | NODE_95_length_1013_cov_53.4893  |
| KP28873 | case_2 | 96 | plasmid     | 0     | 1     | NODE_96_length_820_cov_102.855   |
| KP28873 | case_2 | 97 | chromosomal | 0.647 | 0.353 | NODE_97_length_669_cov_27.049    |
| KP28873 | case_2 | 98 | chromosomal | 0.657 | 0.343 | NODE_98_length_661_cov_11.1404   |
| KP28873 | case_2 | 99 | plasmid     | 0.473 | 0.527 | NODE_99_length_607_cov_38.2604   |

Supplementary Materials

Table S3: Virulomes of *Klebsiella pneumoniae* isolates from this study detected using the Institut Pasteur MLST databases.

| Virulence category                                 | Virulence system                       | Virulence gene | Case   | Genome name | ContigID                          | Pident | Length | Mismatch | Gapopen | Qstart | Qend | Sstart | Send  | Evalue | Bitscore | Coverage | Prediction  |
|----------------------------------------------------|----------------------------------------|----------------|--------|-------------|-----------------------------------|--------|--------|----------|---------|--------|------|--------|-------|--------|----------|----------|-------------|
| Iron acquisition: Siderophore based uptake systems | Fep-Ent System: Enterobactin synthesis | entA           | case_1 | KP2887_2    | NODE_15_length_126807_cov_40.3171 | 99.746 | 786    | 2        | 0       | 1      | 786  | 81996  | 81211 | 0.0    | 1441     | 100      | chromosomal |
|                                                    |                                        | entB           | case_1 | KP2887_2    | NODE_15_length_126807_cov_40.3171 | 99.531 | 852    | 4        | 0       | 1      | 852  | 82817  | 81966 | 0.0    | 1552     | 100      | chromosomal |
|                                                    |                                        | entC           | case_1 | KP2887_2    | NODE_15_length_126807_cov_40.3171 | 99.495 | 1188   | 6        | 0       | 1      | 1188 | 85635  | 84448 | 0.0    | 2161     | 100      | chromosomal |
|                                                    |                                        | entD           | case_1 | KP2887_2    | NODE_15_length_126807_cov_40.3171 | 99.683 | 630    | 2        | 0       | 1      | 630  | 99007  | 99636 | 0.0    | 1153     | 100      | chromosomal |
|                                                    |                                        | entE           | case_1 | KP2887_2    | NODE_15_length_126807_cov_40.3171 | 98.632 | 1608   | 22       | 0       | 1      | 1608 | 84438  | 82831 | 0.0    | 2848     | 100      | chromosomal |
|                                                    |                                        | entF           | case_1 | KP2887_2    | NODE_15_length_126807_cov_40.3171 | 99.304 | 3882   | 27       | 0       | 1      | 3882 | 95002  | 91121 | 0.0    | 7020     | 100      | chromosomal |
|                                                    | Fep-Ent System: Enterobactin receptor  | fepA           | case_1 | KP2887_2    | NODE_15_length_126807_cov_40.3171 | 99.192 | 2229   | 18       | 0       | 1      | 2229 | 96712  | 98940 | 0.0    | 4017     | 100      | chromosomal |
|                                                    |                                        | fepB           | case_1 | KP2887_2    | NODE_15_length_126807_cov_40.3171 | 99.583 | 960    | 4        | 0       | 1      | 960  | 85812  | 86771 | 0.0    | 1751     | 100      | chromosomal |
|                                                    |                                        | fepC           | case_1 | KP2887_2    | NODE_15_length_126807_cov_40.3171 | 99.245 | 795    | 6        | 0       | 1      | 795  | 90262  | 91056 | 0.0    | 1435     | 100      | chromosomal |
|                                                    |                                        | fepD           | case_1 | KP2887_2    | NODE_15_length_126807_cov_40.3171 | 99.702 | 1008   | 3        | 0       | 1      | 1008 | 88269  | 89276 | 0.0    | 1845     | 100      | chromosomal |
|                                                    |                                        | fepG           | case_1 | KP2887_2    | NODE_15_length_126807_cov_40.3171 | 98.892 | 993    | 11       | 0       | 1      | 993  | 89273  | 90265 | 0.0    | 1773     | 100      | chromosomal |
|                                                    |                                        | fes            | case_1 | KP2887_2    | NODE_15_length_126807_cov_40.3171 | 98.925 | 1209   | 13       | 0       | 1      | 1209 | 96452  | 95244 | 0.0    | 2161     | 100      | chromosomal |
|                                                    |                                        | ybdA           | case_1 | KP2887_2    | NODE_15_length_126807_cov_40.3171 | 99.114 | 1242   | 11       | 0       | 1      | 1242 | 88156  | 86915 | 0.0    | 2233     | 100      | chromosomal |

Supplementary Materials

|                 |                                                            |             |        |          |                                  |        |      |    |   |   |      |        |        |     |       |     |             |
|-----------------|------------------------------------------------------------|-------------|--------|----------|----------------------------------|--------|------|----|---|---|------|--------|--------|-----|-------|-----|-------------|
|                 | <b>IroA System: Salmochelin synthesis</b>                  | <b>iroE</b> | case_1 | KP2887_2 | NODE_1_length_389262_cov_34.9217 | 99.145 | 936  | 8  | 0 | 1 | 936  | 303158 | 304093 | 0.0 | 1685  | 100 | chromosomal |
|                 | <b>High-pathogenicity island: Yersiniabactin synthesis</b> | <b>ybtA</b> | case_1 | KP2887_2 | NODE_50_length_19359_cov_4.40763 | 99.583 | 960  | 4  | 0 | 1 | 960  | 16122  | 15163  | 0.0 | 1751  | 100 | chromosomal |
|                 |                                                            | <b>ybtE</b> | case_1 | KP2887_2 | NODE_62_length_10267_cov_4.3949  | 99.747 | 1578 | 4  | 0 | 1 | 1578 | 7644   | 6067   | 0.0 | 2892  | 100 | plasmid     |
|                 |                                                            | <b>ybtP</b> | case_1 | KP2887_2 | NODE_50_length_19359_cov_4.40763 | 99.723 | 1803 | 5  | 0 | 1 | 1803 | 16289  | 18091  | 0.0 | 3302  | 100 | chromosomal |
|                 |                                                            | <b>ybtS</b> | case_1 | KP2887_2 | NODE_130_length_3021_cov_4.33356 | 97.360 | 1212 | 32 | 0 | 1 | 1212 | 1810   | 3021   | 0.0 | 2061  | 93  | chromosomal |
|                 |                                                            | <b>ybtT</b> | case_1 | KP2887_2 | NODE_62_length_10267_cov_4.3949  | 99.627 | 804  | 3  | 0 | 1 | 804  | 8451   | 7648   | 0.0 | 1469  | 100 | plasmid     |
|                 |                                                            | <b>ybtU</b> | case_1 | KP2887_2 | NODE_62_length_10267_cov_4.3949  | 99.311 | 1161 | 8  | 0 | 1 | 1161 | 9608   | 8448   | 0.0 | 2100  | 100 | plasmid     |
|                 |                                                            | <b>ybtX</b> | case_1 | KP2887_2 | NODE_130_length_3021_cov_4.33356 | 97.792 | 1404 | 31 | 0 | 1 | 1404 | 379    | 1782   | 0.0 | 2422  | 100 | chromosomal |
|                 |                                                            | <b>irp1</b> | case_1 | KP2887_2 | NODE_50_length_19359_cov_4.40763 | 99.715 | 8777 | 25 | 0 | 1 | 8777 | 8777   | 1      | 0.0 | 16070 | 92  | chromosomal |
|                 |                                                            | <b>irp2</b> | case_1 | KP2887_2 | NODE_50_length_19359_cov_4.40763 | 99.722 | 6108 | 17 | 0 | 1 | 6108 | 14972  | 8865   | 0.0 | 11186 | 100 | chromosomal |
|                 | <b>High-pathogenicity island: Yersiniabactin receptor</b>  | <b>fyuA</b> | case_1 | KP2887_2 | NODE_62_length_10267_cov_4.3949  | 99.753 | 2022 | 5  | 0 | 1 | 2022 | 5936   | 3915   | 0.0 | 3707  | 100 | plasmid     |
| <b>Fimbriae</b> | <b>Type 1 fimbriae</b>                                     | <b>fimA</b> | case_1 | KP2887_2 | NODE_9_length_177480_cov_42.0453 | 99.454 | 549  | 3  | 0 | 1 | 549  | 65635  | 65087  | 0.0 | 998   | 100 | chromosomal |
|                 |                                                            | <b>fimB</b> | case_1 | KP2887_2 | NODE_9_length_177480_cov_42.0453 | 99.340 | 606  | 4  | 0 | 1 | 606  | 67795  | 67190  | 0.0 | 1098  | 100 | chromosomal |

Supplementary Materials

|  |                        |             |        |          |                                   |        |      |    |   |   |      |       |       |     |      |     |             |
|--|------------------------|-------------|--------|----------|-----------------------------------|--------|------|----|---|---|------|-------|-------|-----|------|-----|-------------|
|  |                        | <b>fimC</b> | case_1 | KP2887_2 | NODE_9_length_177480_cov_42.0_453 | 99.862 | 726  | 1  | 0 | 1 | 726  | 64451 | 63726 | 0.0 | 1336 | 100 | chromosomal |
|  |                        | <b>fimD</b> | case_1 | KP2887_2 | NODE_9_length_177480_cov_42.0_453 | 99.622 | 2646 | 10 | 0 | 1 | 2646 | 63677 | 61032 | 0.0 | 4831 | 100 | chromosomal |
|  |                        | <b>fimE</b> | case_1 | KP2887_2 | NODE_9_length_177480_cov_42.0_453 | 98.686 | 609  | 8  | 0 | 1 | 609  | 66724 | 66116 | 0.0 | 1081 | 100 | chromosomal |
|  |                        | <b>fimF</b> | case_1 | KP2887_2 | NODE_9_length_177480_cov_42.0_453 | 99.058 | 531  | 5  | 0 | 1 | 531  | 61024 | 60494 | 0.0 | 953  | 100 | chromosomal |
|  |                        | <b>fimG</b> | case_1 | KP2887_2 | NODE_9_length_177480_cov_42.0_453 | 99.601 | 501  | 2  | 0 | 1 | 501  | 60481 | 59981 | 0.0 | 915  | 100 | chromosomal |
|  |                        | <b>fimH</b> | case_1 | KP2887_2 | NODE_9_length_177480_cov_42.0_453 | 99.230 | 909  | 7  | 0 | 1 | 909  | 59966 | 59058 | 0.0 | 1640 | 100 | chromosomal |
|  |                        | <b>fimI</b> | case_1 | KP2887_2 | NODE_9_length_177480_cov_42.0_453 | 99.371 | 636  | 4  | 0 | 1 | 636  | 65115 | 64480 | 0.0 | 1153 | 100 | chromosomal |
|  |                        | <b>fimK</b> | case_1 | KP2887_2 | NODE_9_length_177480_cov_42.0_453 | 98.873 | 1242 | 14 | 0 | 1 | 1242 | 58890 | 57649 | 0.0 | 2217 | 100 | chromosomal |
|  | <b>Type 3 fimbriae</b> | <b>mrkA</b> | case_1 | KP2887_2 | NODE_9_length_177480_cov_42.0_453 | 99.836 | 609  | 1  | 0 | 1 | 609  | 72460 | 73068 | 0.0 | 1120 | 100 | chromosomal |
|  |                        | <b>mrkB</b> | case_1 | KP2887_2 | NODE_9_length_177480_cov_42.0_453 | 99.858 | 702  | 1  | 0 | 1 | 702  | 73164 | 73865 | 0.0 | 1291 | 100 | chromosomal |
|  |                        | <b>mrkC</b> | case_1 | KP2887_2 | NODE_9_length_177480_cov_42.0_453 | 99.759 | 2487 | 6  | 0 | 1 | 2487 | 73877 | 76363 | 0.0 | 4560 | 100 | chromosomal |
|  |                        | <b>mrkD</b> | case_1 | KP2887_2 | NODE_9_length_177480_cov_42.0_453 | 99.900 | 996  | 1  | 0 | 1 | 996  | 76354 | 77349 | 0.0 | 1834 | 100 | chromosomal |
|  |                        | <b>mrkF</b> | case_1 | KP2887_2 | NODE_9_length_177480_cov_42.0_453 | 99.843 | 636  | 1  | 0 | 1 | 636  | 77363 | 77998 | 0.0 | 1170 | 100 | chromosomal |
|  |                        | <b>mrkH</b> | case_1 | KP2887_2 | NODE_9_length_177480_cov_42.0_453 | 99.719 | 711  | 2  | 0 | 1 | 711  | 80193 | 79483 | 0.0 | 1303 | 100 | chromosomal |

Supplementary Materials

|                               |                                     |                    |                                  |          |                                   |        |      |     |     |        |        |        |        |     |             |     |             |
|-------------------------------|-------------------------------------|--------------------|----------------------------------|----------|-----------------------------------|--------|------|-----|-----|--------|--------|--------|--------|-----|-------------|-----|-------------|
|                               |                                     | <b>mrkI</b>        | case_1                           | KP2887_2 | NODE_9_length_177480_cov_42.0453  | 99.487 | 585  | 3   | 0   | 1      | 585    | 79477  | 78893  | 0.0 | 1064        | 100 | chromosomal |
|                               |                                     | <b>mrkJ</b>        | case_1                           | KP2887_2 | NODE_9_length_177480_cov_42.0453  | 99.861 | 717  | 1   | 0   | 1      | 717    | 78749  | 78033  | 0.0 | 1319        | 100 | chromosomal |
|                               | <b>E. coli Common Pilus</b>         | <b>ecpE (yagV)</b> | case_1                           | KP2887_2 | NODE_2_length_292640_cov_38.7891  | 85.695 | 755  | 106 | 2   | 3      | 756    | 281878 | 281125 | 0.0 | 795         | 99  | chromosomal |
|                               |                                     | <b>ecpD (yagW)</b> | case_1                           | KP2887_2 | NODE_2_length_292640_cov_38.7891  | 88.936 | 1645 | 180 | 2   | 1      | 1644   | 283447 | 281804 | 0.0 | 2028        | 100 | chromosomal |
|                               |                                     | <b>ecpC (yagX)</b> | case_1                           | KP2887_2 | NODE_2_length_292640_cov_38.7891  | 87.540 | 2528 | 311 | 4   | 1      | 2526   | 285962 | 283437 | 0.0 | 2920        | 100 | chromosomal |
|                               |                                     | <b>ecpB (yagY)</b> | case_1                           | KP2887_2 | NODE_2_length_292640_cov_38.7891  | 87.892 | 669  | 81  | 0   | 1      | 669    | 286656 | 285988 | 0.0 | 787         | 100 | chromosomal |
| <b>ecpA (yagZ)</b>            | case_1                              | KP2887_2           | NODE_2_length_292640_cov_38.7891 | 90.068   | 584                               | 58     | 0    | 1   | 584 | 287302 | 286719 | 0.0    | 758    | 99  | chromosomal |     |             |
| <b>ecpR (ykgK)</b>            | case_1                              | KP2887_2           | NODE_2_length_292640_cov_38.7891 | 86.403   | 581                               | 79     | 0    | 11  | 591 | 287957 | 287377 | 0.0    | 636    | 98  | chromosomal |     |             |
| <b>Lipopolysaccharide</b>     | <b>O-antigen: <i>wb</i> cluster</b> | <b>wzm</b>         | case_1                           | KP2887_2 | NODE_102_length_3897_cov_4.10759  | 99.227 | 776  | 6   | 0   | 5      | 780    | 3897   | 3122   | 0.0 | 1400        | 99  | chromosomal |
|                               |                                     | <b>wzt</b>         | case_1                           | KP2887_2 | NODE_102_length_3897_cov_4.10759  | 99.055 | 741  | 7   | 0   | 1      | 741    | 3122   | 2382   | 0.0 | 1330        | 100 | chromosomal |
|                               |                                     | <b>wbbM</b>        | case_1                           | KP2887_2 | NODE_102_length_3897_cov_4.10759  | 99.314 | 1896 | 13  | 0   | 1      | 1896   | 2366   | 471    | 0.0 | 3430        | 100 | chromosomal |
|                               |                                     | <b>wbbO</b>        | case_1                           | KP2887_2 | NODE_210_length_1423_cov_3.57727  | 99.214 | 1018 | 8   | 0   | 1      | 1018   | 1095   | 78     | 0.0 | 1836        | 90  | chromosomal |
| <b>Capsule polysaccharide</b> | <b>CPS gene loci</b>                | <b>galF</b>        | case_1                           | KP2887_2 | NODE_14_length_131869_cov_35.6086 | 98.885 | 897  | 10  | 0   | 1      | 897    | 38178  | 39074  | 0.0 | 1602        | 100 | chromosomal |
|                               |                                     | <b>cpsACP</b>      | case_1                           | KP2887_2 | NODE_14_length_131869_cov_35.6086 | 94.436 | 629  | 35  | 0   | 1      | 629    | 39467  | 40095  | 0.0 | 968         | 99  | chromosomal |



Supplementary Materials

|                                        |                                        |                    |        |          |                                   |         |      |     |    |   |      |        |        |     |      |     |             |
|----------------------------------------|----------------------------------------|--------------------|--------|----------|-----------------------------------|---------|------|-----|----|---|------|--------|--------|-----|------|-----|-------------|
|                                        |                                        | <b>wzi</b>         | case_1 | KP2887_2 | NODE_14_length_131869_cov_35.6086 | 87.574  | 1521 | 183 | 3  | 1 | 1515 | 40975  | 42495  | 0.0 | 1757 | 100 | chromosomal |
|                                        |                                        | <b>gnd</b>         | case_1 | KP2887_2 | NODE_14_length_131869_cov_35.6086 | 95.665  | 1407 | 61  | 0  | 1 | 1407 | 55441  | 56847  | 0.0 | 2261 | 100 | chromosomal |
|                                        |                                        | <b>manC</b>        | case_1 | KP2887_2 | NODE_124_length_3183_cov_4.47778  | 98.093  | 1416 | 27  | 0  | 1 | 1416 | 435    | 1850   | 0.0 | 2466 | 100 | chromosomal |
|                                        |                                        | <b>manB</b>        | case_1 | KP2887_2 | NODE_124_length_3183_cov_4.47778  | 98.551  | 1311 | 19  | 0  | 1 | 1311 | 1873   | 3183   | 0.0 | 2316 | 96  | chromosomal |
|                                        |                                        | <b>ugd</b>         | case_1 | KP2887_2 | NODE_14_length_131869_cov_35.6086 | 96.829  | 1167 | 37  | 0  | 1 | 1167 | 60702  | 61868  | 0.0 | 1951 | 100 | chromosomal |
|                                        | <b>CPS synthesis regulator</b>         | <b>rcsA</b>        | case_1 | KP2887_2 | NODE_5_length_228449_cov_35.4333  | 100.000 | 624  | 0   | 0  | 1 | 624  | 11111  | 10488  | 0.0 | 1153 | 100 | chromosomal |
|                                        |                                        | <b>rcsB</b>        | case_1 | KP2887_2 | NODE_6_length_203863_cov_36.4848  | 99.693  | 651  | 2   | 0  | 1 | 651  | 124328 | 123678 | 0.0 | 1192 | 100 | chromosomal |
| <b>Outer membrane proteins</b>         | <b>Outer membrane protein A</b>        | <b>ompA</b>        | case_1 | KP2887_2 | NODE_4_length_230310_cov_35.9925  | 84.220  | 1071 | 139 | 10 | 1 | 1041 | 133810 | 134880 | 0.0 | 1014 | 100 | chromosomal |
|                                        | <b>Efflux pump</b>                     | <b>acrA</b>        | case_1 | KP2887_2 | NODE_2_length_292640_cov_38.7891  | 99.414  | 1194 | 7   | 0  | 1 | 1194 | 128013 | 129206 | 0.0 | 2167 | 100 | chromosomal |
|                                        |                                        | <b>acrB</b>        | case_1 | KP2887_2 | NODE_2_length_292640_cov_38.7891  | 99.809  | 3147 | 6   | 0  | 1 | 3147 | 129229 | 132375 | 0.0 | 5779 | 100 | chromosomal |
| <b>Type VI secretion system (T6SS)</b> | <b>Type VI secretion system (T6SS)</b> | <b>tssJ (sciN)</b> | case_1 | KP2887_2 | NODE_7_length_203049_cov_34.8131  | 99.816  | 543  | 1   | 0  | 1 | 543  | 197069 | 196527 | 0.0 | 998  | 100 | chromosomal |
|                                        |                                        | <b>tssF</b>        | case_1 | KP2887_2 | NODE_7_length_203049_cov_34.8131  | 99.373  | 1755 | 11  | 0  | 1 | 1755 | 199850 | 198096 | 0.0 | 3181 | 100 | chromosomal |
|                                        |                                        | <b>tssG</b>        | case_1 | KP2887_2 | NODE_7_length_203049_cov_34.8131  | 99.448  | 1086 | 6   | 0  | 1 | 1086 | 198132 | 197047 | 0.0 | 1973 | 100 | chromosomal |
|                                        |                                        | <b>tssK (vasE)</b> | case_1 | KP2887_2 | NODE_33_length_50217_cov_28.9361  | 100.000 | 1344 | 0   | 0  | 1 | 1344 | 8133   | 6790   | 0.0 | 2483 | 100 | chromosomal |

Supplementary Materials

|                                                           |                                               |                    |        |          |                                   |         |      |    |   |     |      |       |       |           |      |     |             |
|-----------------------------------------------------------|-----------------------------------------------|--------------------|--------|----------|-----------------------------------|---------|------|----|---|-----|------|-------|-------|-----------|------|-----|-------------|
|                                                           |                                               | <b>tssB (vipA)</b> | case_1 | KP2887_2 | NODE_33_length_50217_cov_28.9361  | 99.797  | 492  | 1  | 0 | 1   | 492  | 10221 | 9730  | 0.0       | 904  | 100 | chromosomal |
|                                                           |                                               | <b>tssC (vipB)</b> | case_1 | KP2887_2 | NODE_33_length_50217_cov_28.9361  | 100.000 | 1545 | 0  | 0 | 1   | 1545 | 9687  | 8143  | 0.0       | 2854 | 100 | chromosomal |
|                                                           |                                               | <b>tssL (dotU)</b> | case_1 | KP2887_2 | NODE_33_length_50217_cov_28.9361  | 100.000 | 690  | 0  | 0 | 1   | 690  | 6793  | 6104  | 0.0       | 1275 | 100 | chromosomal |
|                                                           |                                               | <b>tssH (clpV)</b> | case_1 | KP2887_2 | NODE_33_length_50217_cov_28.9361  | 100.000 | 2655 | 0  | 0 | 1   | 2655 | 3640  | 986   | 0.0       | 4903 | 100 | chromosomal |
|                                                           |                                               | <b>tssM (icmF)</b> | case_1 | KP2887_2 | NODE_125_length_3140_cov_31.1877  | 97.528  | 3034 | 75 | 0 | 391 | 3424 | 3140  | 107   | 0.0       | 5188 | 89  | chromosomal |
|                                                           |                                               | <b>tssA (impA)</b> | case_1 | KP2887_2 | NODE_193_length_1737_cov_3.98253  | 100.000 | 380  | 0  | 0 | 29  | 408  | 1737  | 1358  | 0.0       | 702  | 93  | chromosomal |
|                                                           |                                               | <b>tssD (hcp)</b>  | case_1 | KP2887_2 | NODE_33_length_50217_cov_28.9361  | 100.000 | 492  | 0  | 0 | 1   | 492  | 4396  | 3905  | 0.0       | 909  | 100 | chromosomal |
| <b>PaaR repeat-containing protein</b>                     |                                               | <b>KPHS_23120</b>  | case_1 | case_1   | NODE_111_length_3762_cov_3.86893  | 100.000 | 258  | 0  | 0 | 1   | 258  | 1844  | 1587  | 2.45e-135 | 477  | 100 | chromosomal |
| <b>Cognate immune protein</b>                             |                                               | <b>tli1</b>        | case_1 | KP2887_2 | NODE_143_length_2713_cov_5.15175  | 92.697  | 534  | 33 | 4 | 1   | 531  | 643   | 113   | 0.0       | 765  | 100 | chromosomal |
| <b>Iron acquisition: Siderophore based uptake systems</b> | <b>Fep-Ent System: Enterobactin synthesis</b> | <b>entA</b>        | case_2 | KP2887_3 | NODE_15_length_126807_cov_24.1097 | 99.746  | 786  | 2  | 0 | 1   | 786  | 81996 | 81211 | 0.0       | 1441 | 100 | chromosomal |
|                                                           |                                               | <b>entB</b>        | case_2 | KP2887_3 | NODE_15_length_126807_cov_24.1097 | 99.531  | 852  | 4  | 0 | 1   | 852  | 82817 | 81966 | 0.0       | 1552 | 100 | chromosomal |
|                                                           |                                               | <b>entC</b>        | case_2 | KP2887_3 | NODE_15_length_126807_cov_24.1097 | 99.495  | 1188 | 6  | 0 | 1   | 1188 | 85635 | 84448 | 0.0       | 2161 | 100 | chromosomal |
|                                                           |                                               | <b>entD</b>        | case_2 | KP2887_3 | NODE_15_length_126807_cov_24.1097 | 99.683  | 630  | 2  | 0 | 1   | 630  | 99007 | 99636 | 0.0       | 1153 | 100 | chromosomal |
|                                                           |                                               | <b>entE</b>        | case_2 | KP2887_3 | NODE_15_length_126807_cov_24.1097 | 98.632  | 1608 | 22 | 0 | 1   | 1608 | 84438 | 82831 | 0.0       | 2848 | 100 | chromosomal |

Supplementary Materials

|                 |                                              |             |        |          |                                   |        |      |    |   |   |      |       |       |     |      |     |             |
|-----------------|----------------------------------------------|-------------|--------|----------|-----------------------------------|--------|------|----|---|---|------|-------|-------|-----|------|-----|-------------|
|                 |                                              | <b>entF</b> | case_2 | KP2887_3 | NODE_15_length_126807_cov_24.1097 | 99.304 | 3882 | 27 | 0 | 1 | 3882 | 95002 | 91121 | 0.0 | 7020 | 100 | chromosomal |
|                 | <b>Fep-Ent System: Enterobactin receptor</b> | <b>fepA</b> | case_2 | KP2887_3 | NODE_15_length_126807_cov_24.1097 | 99.192 | 2229 | 18 | 0 | 1 | 2229 | 96712 | 98940 | 0.0 | 4017 | 100 | chromosomal |
|                 |                                              | <b>fepB</b> | case_2 | KP2887_3 | NODE_15_length_126807_cov_24.1097 | 99.583 | 960  | 4  | 0 | 1 | 960  | 85812 | 86771 | 0.0 | 1751 | 100 | chromosomal |
|                 |                                              | <b>fepC</b> | case_2 | KP2887_3 | NODE_15_length_126807_cov_24.1097 | 99.245 | 795  | 6  | 0 | 1 | 795  | 90262 | 91056 | 0.0 | 1435 | 100 | chromosomal |
|                 |                                              | <b>fepD</b> | case_2 | KP2887_3 | NODE_15_length_126807_cov_24.1097 | 99.702 | 1008 | 3  | 0 | 1 | 1008 | 88269 | 89276 | 0.0 | 1845 | 100 | chromosomal |
|                 |                                              | <b>fepG</b> | case_2 | KP2887_3 | NODE_15_length_126807_cov_24.1097 | 98.892 | 993  | 11 | 0 | 1 | 993  | 89273 | 90265 | 0.0 | 1773 | 100 | chromosomal |
|                 |                                              | <b>fes</b>  | case_2 | KP2887_3 | NODE_15_length_126807_cov_24.1097 | 98.925 | 1209 | 13 | 0 | 1 | 1209 | 96452 | 95244 | 0.0 | 2161 | 100 | chromosomal |
|                 |                                              | <b>ybdA</b> | case_2 | KP2887_3 | NODE_15_length_126807_cov_24.1097 | 99.114 | 1242 | 11 | 0 | 1 | 1242 | 88156 | 86915 | 0.0 | 2233 | 100 | chromosomal |
|                 | <b>IroA System: Salmochelin synthesis</b>    | <b>iroE</b> | case_2 | KP2887_3 | NODE_3_length_232248_cov_20.9202  | 99.145 | 936  | 8  | 0 | 1 | 936  | 86105 | 85170 | 0.0 | 1685 | 100 | chromosomal |
| <b>Fimbriae</b> | <b>Type 1 fimbriae</b>                       | <b>fimA</b> | case_2 | KP2887_3 | NODE_8_length_177371_cov_24.7878  | 99.454 | 549  | 3  | 0 | 1 | 549  | 65635 | 65087 | 0.0 | 998  | 100 | chromosomal |
|                 |                                              | <b>fimB</b> | case_2 | KP2887_3 | NODE_8_length_177371_cov_24.7878  | 99.340 | 606  | 4  | 0 | 1 | 606  | 67795 | 67190 | 0.0 | 1098 | 100 | chromosomal |
|                 |                                              | <b>fimC</b> | case_2 | KP2887_3 | NODE_8_length_177371_cov_24.7878  | 99.862 | 726  | 1  | 0 | 1 | 726  | 64451 | 63726 | 0.0 | 1336 | 100 | chromosomal |
|                 |                                              | <b>fimD</b> | case_2 | KP2887_3 | NODE_8_length_177371_cov_24.7878  | 99.622 | 2646 | 10 | 0 | 1 | 2646 | 63677 | 61032 | 0.0 | 4831 | 100 | chromosomal |
|                 |                                              | <b>fimE</b> | case_2 | KP2887_3 | NODE_8_length_177371_cov_24.7878  | 98.686 | 609  | 8  | 0 | 1 | 609  | 66724 | 66116 | 0.0 | 1081 | 100 | chromosomal |

Supplementary Materials

|                       |                    |        |          |                                  |        |      |     |   |   |      |        |        |     |      |     |             |
|-----------------------|--------------------|--------|----------|----------------------------------|--------|------|-----|---|---|------|--------|--------|-----|------|-----|-------------|
|                       |                    |        | 3        |                                  |        |      |     |   |   |      |        |        |     |      |     |             |
|                       | <b>fimF</b>        | case_2 | KP2887_3 | NODE_8_length_177371_cov_24.7878 | 99.058 | 531  | 5   | 0 | 1 | 531  | 61024  | 60494  | 0.0 | 953  | 100 | chromosomal |
|                       | <b>fimG</b>        | case_2 | KP2887_3 | NODE_8_length_177371_cov_24.7878 | 99.401 | 501  | 3   | 0 | 1 | 501  | 60481  | 59981  | 0.0 | 909  | 100 | chromosomal |
|                       | <b>fimH</b>        | case_2 | KP2887_3 | NODE_8_length_177371_cov_24.7878 | 99.230 | 909  | 7   | 0 | 1 | 909  | 59966  | 59058  | 0.0 | 1640 | 100 | chromosomal |
|                       | <b>fimI</b>        | case_2 | KP2887_3 | NODE_8_length_177371_cov_24.7878 | 99.371 | 636  | 4   | 0 | 1 | 636  | 65115  | 64480  | 0.0 | 1153 | 100 | chromosomal |
|                       | <b>fimK</b>        | case_2 | KP2887_3 | NODE_8_length_177371_cov_24.7878 | 98.873 | 1242 | 14  | 0 | 1 | 1242 | 58890  | 57649  | 0.0 | 2217 | 100 | chromosomal |
|                       | <b>mrkA</b>        | case_2 | KP2887_3 | NODE_8_length_177371_cov_24.7878 | 99.836 | 609  | 1   | 0 | 1 | 609  | 72460  | 73068  | 0.0 | 1120 | 100 | chromosomal |
|                       | <b>mrkB</b>        | case_2 | KP2887_3 | NODE_8_length_177371_cov_24.7878 | 99.858 | 702  | 1   | 0 | 1 | 702  | 73164  | 73865  | 0.0 | 1291 | 100 | chromosomal |
|                       | <b>mrkC</b>        | case_2 | KP2887_3 | NODE_8_length_177371_cov_24.7878 | 99.759 | 2487 | 6   | 0 | 1 | 2487 | 73877  | 76363  | 0.0 | 4560 | 100 | chromosomal |
|                       | <b>mrkD</b>        | case_2 | KP2887_3 | NODE_8_length_177371_cov_24.7878 | 99.900 | 996  | 1   | 0 | 1 | 996  | 76354  | 77349  | 0.0 | 1834 | 100 | chromosomal |
|                       | <b>mrkF</b>        | case_2 | KP2887_3 | NODE_8_length_177371_cov_24.7878 | 99.843 | 636  | 1   | 0 | 1 | 636  | 77363  | 77998  | 0.0 | 1170 | 100 | chromosomal |
|                       | <b>mrkH</b>        | case_2 | KP2887_3 | NODE_8_length_177371_cov_24.7878 | 99.719 | 711  | 2   | 0 | 1 | 711  | 80193  | 79483  | 0.0 | 1303 | 100 | chromosomal |
|                       | <b>mrkI</b>        | case_2 | KP2887_3 | NODE_8_length_177371_cov_24.7878 | 99.487 | 585  | 3   | 0 | 1 | 585  | 79477  | 78893  | 0.0 | 1064 | 100 | chromosomal |
|                       | <b>mrkJ</b>        | case_2 | KP2887_3 | NODE_8_length_177371_cov_24.7878 | 99.861 | 717  | 1   | 0 | 1 | 717  | 78749  | 78033  | 0.0 | 1319 | 100 | chromosomal |
| <b>E. coli Common</b> | <b>ecpE (yagV)</b> | case_2 | KP2887   | NODE_2_length_292612_cov_23.6881 | 85.695 | 755  | 106 | 2 | 3 | 756  | 281738 | 280985 | 0.0 | 795  | 99  | chromosomal |

Supplementary Materials

|                         |                          |                    |        |          |                                  |         |      |     |    |    |      |        |        |     |      |     |             |
|-------------------------|--------------------------|--------------------|--------|----------|----------------------------------|---------|------|-----|----|----|------|--------|--------|-----|------|-----|-------------|
|                         | Pilus                    |                    |        | 3        |                                  |         |      |     |    |    |      |        |        |     |      |     |             |
|                         |                          | <b>ecpD (yagW)</b> | case_2 | KP2887_3 | NODE_2_length_292612_cov_23.6881 | 88.936  | 1645 | 180 | 2  | 1  | 1644 | 283307 | 281664 | 0.0 | 2028 | 100 | chromosomal |
|                         |                          | <b>ecpC (yagX)</b> | case_2 | KP2887_3 | NODE_2_length_292612_cov_23.6881 | 87.540  | 2528 | 311 | 4  | 1  | 2526 | 285822 | 283297 | 0.0 | 2920 | 100 | chromosomal |
|                         |                          | <b>ecpB (yagY)</b> | case_2 | KP2887_3 | NODE_2_length_292612_cov_23.6881 | 87.892  | 669  | 81  | 0  | 1  | 669  | 286516 | 285848 | 0.0 | 787  | 100 | chromosomal |
|                         |                          | <b>ecpA (yagZ)</b> | case_2 | KP2887_3 | NODE_2_length_292612_cov_23.6881 | 90.068  | 584  | 58  | 0  | 1  | 584  | 287162 | 286579 | 0.0 | 758  | 99  | chromosomal |
|                         |                          | <b>ecpR (ykgK)</b> | case_2 | KP2887_3 | NODE_2_length_292612_cov_23.6881 | 86.403  | 581  | 79  | 0  | 11 | 591  | 287817 | 287237 | 0.0 | 636  | 98  | chromosomal |
| Capsule polysaccharide  | CPS gene loci            | <b>galF</b>        | case_2 | KP2887_3 | NODE_29_length_72276_cov_23.3432 | 98.885  | 897  | 10  | 0  | 1  | 897  | 34325  | 33429  | 0.0 | 1602 | 100 | chromosomal |
|                         |                          | <b>cpsACP</b>      | case_2 | KP2887_3 | NODE_29_length_72276_cov_23.3432 | 94.436  | 629  | 35  | 0  | 1  | 629  | 33036  | 32408  | 0.0 | 968  | 99  | chromosomal |
|                         |                          | <b>wzi</b>         | case_2 | KP2887_3 | NODE_29_length_72276_cov_23.3432 | 87.574  | 1521 | 183 | 3  | 1  | 1515 | 31528  | 30008  | 0.0 | 1757 | 100 | chromosomal |
|                         |                          | <b>gnd</b>         | case_2 | KP2887_3 | NODE_29_length_72276_cov_23.3432 | 95.665  | 1407 | 61  | 0  | 1  | 1407 | 17062  | 15656  | 0.0 | 2261 | 100 | chromosomal |
|                         |                          | <b>ugd</b>         | case_2 | KP2887_3 | NODE_29_length_72276_cov_23.3432 | 96.829  | 1167 | 37  | 0  | 1  | 1167 | 11801  | 10635  | 0.0 | 1951 | 100 | chromosomal |
|                         | CPS synthesis regulator  | <b>rcsA</b>        | case_2 | KP2887_3 | NODE_31_length_68754_cov_21.9329 | 100.000 | 624  | 0   | 0  | 1  | 624  | 57644  | 58267  | 0.0 | 1153 | 100 | chromosomal |
|                         |                          | <b>rcsB</b>        | case_2 | KP2887_3 | NODE_6_length_203642_cov_23.1249 | 99.693  | 651  | 2   | 0  | 1  | 651  | 124107 | 123457 | 0.0 | 1192 | 100 | chromosomal |
| Outer membrane proteins | Outer membrane protein A | <b>ompA</b>        | case_2 | KP2887_3 | NODE_4_length_230166_cov_22.0558 | 84.220  | 1071 | 139 | 10 | 1  | 1041 | 96357  | 95287  | 0.0 | 1014 | 100 | chromosomal |
|                         | Efflux pump              | <b>acrA</b>        | case_2 | KP2887_3 | NODE_2_length_292612_cov_23.6881 | 99.414  | 1194 | 7   | 0  | 1  | 1194 | 12787  | 12906  | 0.0 | 2167 | 100 | chromosomal |

Supplementary Materials

|                                        |                                        |                    |        |         |                                  |        |      |    |   |     |      |        |        |     |      |     |             |
|----------------------------------------|----------------------------------------|--------------------|--------|---------|----------------------------------|--------|------|----|---|-----|------|--------|--------|-----|------|-----|-------------|
|                                        |                                        |                    | 2      | 3       | 881                              |        |      |    |   |     |      | 3      | 6      |     |      |     | al          |
|                                        |                                        | <b>acrB</b>        | case_2 | KP28873 | NODE_2_length_292612_cov_23.6881 | 99.809 | 3147 | 6  | 0 | 1   | 3147 | 129089 | 132235 | 0.0 | 5779 | 100 | chromosomal |
| <b>Type VI secretion system (T6SS)</b> | <b>Type VI secretion system (T6SS)</b> | <b>tssM (icmF)</b> | case_2 | KP28873 | NODE_5_length_210342_cov_20.2479 | 97.403 | 3080 | 80 | 0 | 345 | 3424 | 4185   | 7264   | 0.0 | 5245 | 90  | chromosomal |
|                                        |                                        | <b>tssJ (sciN)</b> | case_2 | KP28873 | NODE_5_length_210342_cov_20.2479 | 99.816 | 543  | 1  | 0 | 1   | 543  | 13274  | 13816  | 0.0 | 998  | 100 | chromosomal |
|                                        |                                        | <b>tssF</b>        | case_2 | KP28873 | NODE_5_length_210342_cov_20.2479 | 99.373 | 1755 | 11 | 0 | 1   | 1755 | 10493  | 12247  | 0.0 | 3181 | 100 | chromosomal |
|                                        |                                        | <b>tssG</b>        | case_2 | KP28873 | NODE_5_length_210342_cov_20.2479 | 99.448 | 1086 | 6  | 0 | 1   | 1086 | 12211  | 13296  | 0.0 | 1973 | 100 | chromosomal |

Supplementary Materials

Table S4: Antimicrobial resistance genes detected using ResFinder 3.1 from *K. pneumoniae* isolates from this study.

| Case   | Genome name | Database                           | Resistance gene | Identity | Query / Template length | ContigID                         | Position in contig | Predicted phenotype                                      | Accession number | Prediction  |
|--------|-------------|------------------------------------|-----------------|----------|-------------------------|----------------------------------|--------------------|----------------------------------------------------------|------------------|-------------|
| case_1 | KP28872     | aminoglycoside and flouroquinolone | aac(6)-Ib-cr    | 100      | 600 / 600               | NODE_133_length_2976_cov_15.4984 | 2264..2863         | Fluoroquinolone and aminoglycoside resistance            | DQ303918         | plasmid     |
| case_1 | KP28872     | aminoglycoside                     | aadA1           | 100      | 792 / 792               | NODE_84_length_5212_cov_29.0715  | 1825..2616         | Aminoglycoside resistance                                | JX185132         | plasmid     |
| case_1 | KP28872     | aminoglycoside                     | aadA16          | 99.65    | 846 / 846               | NODE_133_length_2976_cov_15.4984 | 83..928            | Aminoglycoside resistance                                | EU675686         | plasmid     |
| case_1 | KP28872     | aminoglycoside                     | aph(3'')-Ib     | 100      | 804 / 804               | NODE_52_length_16943_cov_14.2677 | 9480..10283        | Aminoglycoside resistance<br>Alternate name; aph(3'')-Ib | AF321551         | plasmid     |
| case_1 | KP28872     | aminoglycoside                     | aph(6)-Id       | 100      | 837 / 837               | NODE_52_length_16943_cov_14.2677 | 10283..11119       | Aminoglycoside resistance<br>Alternate name; aph(6)-Id   | M28829           | plasmid     |
| case_1 | KP28872     | beta-lactam (ESBL)                 | blaCTX-M-15     | 100      | 876 / 876               | NODE_52_length_16943_cov_14.2677 | 15522..16397       | Beta-lactam resistance Alternate name; UOE-1             | AY044436         | plasmid     |
| case_1 | KP28872     | beta-lactam                        | blaOXA-1        | 100      | 831 / 831               | NODE_199_length_1632_cov_11.409  | 657..1487          | Beta-lactam resistance                                   | HQ170510         | plasmid     |
| case_1 | KP28872     | beta-lactam                        | blaSHV-187      | 99.88    | 867 / 867               | NODE_1_length_389262_cov_34.9217 | 381172..382038     | Beta-lactam resistance                                   | LN515533         | chromosomal |
| case_1 | KP28872     | beta-lactam                        | blaTEM-1B       | 100      | 861 / 861               | NODE_52_length_16943_cov_14.2677 | 11840..12700       | Beta-lactam resistance Alternate name; RblaTEM-1         | AY458016         | plasmid     |
| case_1 | KP28872     | fosfomycin                         | fosA            | 99.29    | 420 / 420               | NODE_3_length_260172_cov_39.2366 | 14164..14583       | Fosfomycin resistance                                    | ACWO01000079     | chromosomal |
| case_1 | KP28872     | phenicol                           | catA1           | 99.85    | 660 / 660               | NODE_189_length_1787_cov_15.7918 | 428..1087          | Phenicol resistance                                      | V00622           | plasmid     |
| case_1 | KP28872     | phenicol                           | catB3           | 100      | 442 / 633               | NODE_199_length_1632_cov_11.409  | 78..519            | Phenicol resistance                                      | AJ009818         | plasmid     |
| case_1 | KP28872     | quinolone                          | oqxA            | 100      | 1176 / 1176             | NODE_31_length_62746_cov_96.3854 | 3669..4844         | Quinolone resistance                                     | EU370913         | chromosomal |
| case_1 | KP28872     | quinolone                          | oqxB            | 99.27    | 3153 / 3153             | NODE_31_length_62746_cov_96.3854 | 4868..8020         | Quinolone resistance                                     | EU370913         | chromosomal |
| case_1 | KP28872     | rifampicin                         | ARR-3           | 100      | 453 / 453               | NODE_133_length_2976_cov_15.4984 | 1715..2167         | Rifampicin resistance                                    | JF806499         | plasmid     |
| case_1 | KP28872     | sulphonamide                       | sul1            | 100      | 840 / 840               | NODE_84_length_5212_cov_29.0715  | 481..1320          | Sulphonamide resistance                                  | U12338           | plasmid     |
| case_1 | KP28872     | sulphonamide                       | sul2            | 100      | 816 / 816               | NODE_52_length_16943_cov_14.2677 | 8604..9419         | Sulphonamide resistance                                  | AY034138         | plasmid     |
| case_1 | KP28872     | trimethoprim                       | dfrA1           | 99.79    | 474 / 474               | NODE_84_length_5212_cov_29.0715  | 2709..3182         | Trimethoprim resistance                                  | AF203818         | plasmid     |
| case_1 | KP28872     | trimethoprim                       | dfrA14          | 100      | 474 / 474               | NODE_76_length_6551_cov_10.9166  | 5988..6461         | Trimethoprim resistance                                  | KF921535         | plasmid     |
| case_1 | KP28872     | trimethoprim                       | dfrA27          | 100      | 474 / 474               | NODE_133_length_2976_cov_15.4984 | 1109..1582         | Trimethoprim resistance                                  | FJ459817         | plasmid     |
| case_2 | KP28873     | aminoglycoside and flouroquinolone | aac(6)-Ib-cr    | 100      | 600 / 600               | NODE_74_length_2909_cov_16.2479  | 2264..2863         | Fluoroquinolone and aminoglycoside resistance            | DQ303918         | plasmid     |
| case_2 | KP28873     | aminoglycoside                     | aadA1           | 100      | 792 / 792               | NODE_65_length_5212_cov_21.6952  | 1825..2616         | Aminoglycoside resistance                                | JX185132         | plasmid     |
| case_2 | KP28873     | aminoglycoside                     | aadA16          | 99.65    | 846 / 846               | NODE_74_length_2909_cov_16.2479  | 83..928            | Aminoglycoside resistance                                | EU675686         | plasmid     |
| case_2 | KP28873     | aminoglycoside                     | aph(3'')-Ib     | 100      | 804 / 804               | NODE_61_length_7303_cov_11.0559  | 5119..5922         | Aminoglycoside resistance<br>Alternate name; aph(3'')-Ib | AF321551         | plasmid     |
| case_2 | KP28873     | aminoglycoside                     | aph(6)-Id       | 100      | 837 / 837               | NODE_61_length_7303_cov_11.0559  | 4283..5119         | Aminoglycoside resistance<br>Alternate name; aph(6)-Id   | M28829           | plasmid     |
| case_2 | KP28873     | beta-lactam                        | blaOXA-1        | 100      | 831 / 831               | NODE_84_length_1632_cov_10.2695  | 657..1487          | Beta-lactam resistance                                   | HQ170510         | plasmid     |

## Supplementary Materials

|        |         |              |            |       |             |                                  |              |                                                  |              |             |
|--------|---------|--------------|------------|-------|-------------|----------------------------------|--------------|--------------------------------------------------|--------------|-------------|
| case_2 | KP28873 | beta-lactam  | blaSHV-187 | 99.88 | 867 / 867   | NODE_3_length_232248_cov_20.9202 | 7225..8091   | Beta-lactam resistance                           | LN515533     | chromosomal |
| case_2 | KP28873 | beta-lactam  | blaTEM-1B  | 100   | 861 / 861   | NODE_61_length_7303_cov_11.0559  | 2702..3562   | Beta-lactam resistance Alternate name; RblaTEM-1 | AY458016     | plasmid     |
| case_2 | KP28873 | fosfomycin   | fosA       | 99.29 | 420 / 420   | NODE_1_length_355714_cov_24.3492 | 14164..14583 | Fosfomycin resistance                            | ACWO01000079 | chromosomal |
| case_2 | KP28873 | phenicol     | catA1      | 99.85 | 660 / 660   | NODE_81_length_1912_cov_15.3292  | 546..1205    | Phenicol resistance                              | V00622       | plasmid     |
| case_2 | KP28873 | phenicol     | catB3      | 100   | 442 / 633   | NODE_84_length_1632_cov_10.2695  | 78..519      | Phenicol resistance                              | AJ009818     | plasmid     |
| case_2 | KP28873 | quinolone    | oqxA       | 100   | 1176 / 1176 | NODE_33_length_62746_cov_23.7741 | 3669..4844   | Quinolone resistance                             | EU370913     | chromosomal |
| case_2 | KP28873 | quinolone    | oqxB       | 99.27 | 3153 / 3153 | NODE_33_length_62746_cov_23.7741 | 4868..8020   | Quinolone resistance                             | EU370913     | chromosomal |
| case_2 | KP28873 | rifampicin   | ARR-3      | 100   | 453 / 453   | NODE_74_length_2909_cov_16.2479  | 1715..2167   | Rifampicin resistance                            | JF806499     | plasmid     |
| case_2 | KP28873 | sulphonamide | sul1       | 100   | 840 / 840   | NODE_65_length_5212_cov_21.6952  | 481..1320    | Sulphonamide resistance                          | U12338       | plasmid     |
| case_2 | KP28873 | sulphonamide | sul2       | 100   | 816 / 816   | NODE_61_length_7303_cov_11.0559  | 5983..6798   | Sulphonamide resistance                          | AY034138     | plasmid     |
| case_2 | KP28873 | trimethoprim | dfrA1      | 99.79 | 474 / 474   | NODE_65_length_5212_cov_21.6952  | 2709..3182   | Trimethoprim resistance                          | AF203818     | plasmid     |
| case_2 | KP28873 | trimethoprim | dfrA27     | 100   | 474 / 474   | NODE_74_length_2909_cov_16.2479  | 1109..1582   | Trimethoprim resistance                          | FJ459817     | plasmid     |



*Supplementary Materials*

Table S5: The presence of integrative and conjugative element ICEKp1 and ICEKp2 in this study.

| Marker genes  | Genome name | ContigID                         | Pident | Length | Mismatch | Gapopen | Qstart | Qend | Sstart | Send | Evalue | Bitscore | Coverage | ICEKp                         | Case   | Prediction  |
|---------------|-------------|----------------------------------|--------|--------|----------|---------|--------|------|--------|------|--------|----------|----------|-------------------------------|--------|-------------|
| int           | KP28872     | NODE_69_length_7821_cov_4.72314  | 97.245 | 1234   | 34       | 0       | 1      | 1234 | 238    | 1471 | 0      | 2091     | 98       | ICEKp1                        | case_1 | chromosomal |
| irp1          | KP28872     | NODE_50_length_19359_cov_4.40763 | 99.656 | 6108   | 21       | 0       | 1      | 6108 | 14972  | 8865 | 0      | 11164    | 100      | ICEKp1                        | case_1 | chromosomal |
| ybtT          | KP28872     | NODE_62_length_10267_cov_4.3949  | 99.729 | 738    | 2        | 0       | 1      | 738  | 8385   | 7648 | 0      | 1352     | 100      | ICEKp1                        | case_1 | plasmid     |
| virB4         | KP28872     | NODE_85_length_5208_cov_3.69577  | 97.481 | 2739   | 69       | 0       | 1      | 2739 | 194    | 2932 | 0      | 4676     | 100      | ICEKp1                        | case_1 | plasmid     |
| mobB          | KP28872     | NODE_163_length_2283_cov_4.06754 | 92.736 | 1597   | 114      | 2       | 1      | 1596 | 688    | 2283 | 0      | 2305     | 86       | ICEKp1                        | case_1 | chromosomal |
| int2a         | KP28872     | NODE_137_length_2875_cov_4.63331 | 100    | 801    | 0        | 0       | 1      | 801  | 1118   | 318  | 0      | 1480     | 100      | ICEKp2                        | case_1 | chromosomal |
| int2b         | KP28872     | NODE_176_length_2015_cov_4.20691 | 100    | 808    | 0        | 0       | 1      | 808  | 808    | 1    | 0      | 1493     | 90       | ICEKp2                        | case_1 | chromosomal |
| mcp           | KP28872     | NODE_110_length_3772_cov_4.08444 | 100    | 741    | 0        | 0       | 1      | 741  | 843    | 103  | 0      | 1369     | 100      | ICEKp2                        | case_1 | chromosomal |
| traI          | KP28872     | NODE_137_length_2875_cov_4.63331 | 100    | 1290   | 0        | 0       | 1      | 1290 | 2571   | 1282 | 0      | 2383     | 100      | ICEKp2                        | case_1 | chromosomal |
| mob2          | KP28872     | NODE_60_length_10594_cov_4.70533 | 100    | 2100   | 0        | 0       | 1      | 2100 | 8912   | 6813 | 0      | 3879     | 100      | ICEKp2                        | case_1 | chromosomal |
| traU/PFL_4710 | KP28872     | NODE_95_length_4393_cov_4.24351  | 99.894 | 942    | 1        | 0       | 1      | 942  | 2116   | 3057 | 0      | 1735     | 100      | ICEKp2                        | case_1 | chromosomal |
|               | KP28873     | -                                | -      | -      | -        | -       | -      | -    | -      | -    | -      | -        | -        | negative to ICEKp1 and ICEKp2 | case_2 | -           |

*Supplementary Materials*

Table S6: Plasmid replicons types identified in the study.

| Case   | Genome name | Plasmid   | Identity | Query / Template length | ContigID                         | Position in contig | Accession number         | Prediction |
|--------|-------------|-----------|----------|-------------------------|----------------------------------|--------------------|--------------------------|------------|
| case_1 | KP28872     | IncFIB(K) | 100      | 560 / 560               | NODE_77_length_6167_cov_22.7044  | 3477..4036         | <a href="#">IN233704</a> | plasmid    |
| case_1 | KP28872     | IncFII(K) | 100      | 148 / 148               | NODE_116_length_3602_cov_15.9452 | 1741..1888         | <a href="#">CP000648</a> | plasmid    |
| case_2 | KP28873     | IncFIB(K) | 100      | 560 / 560               | NODE_64_length_6167_cov_19.0051  | 3477..4036         | <a href="#">IN233704</a> | plasmid    |
| case_2 | KP28873     | IncFII(K) | 100      | 148 / 148               | NODE_59_length_7362_cov_14.3065  | 1741..1888         | <a href="#">CP000648</a> | plasmid    |
